# Supplementary material for: Replicated anthropogenic hybridisations reveal parallel patterns of admixture in marine mussels
Source: bioRxiv or medRxiv preprint supplement (doi:10.1101/590737), 2019-11-18
Supplement: Supplementary file [file media-1.pdf]

# Replicated anthropogenic hybridisations reveal parallel patterns of admixture in marine mussels.

Alexis Simon<sup>1</sup>, Christine Arbiol<sup>1</sup>, Einar Eg Nielsen<sup>2</sup>, Jérôme Couteau<sup>3</sup>,  
Rossana Sussarellu<sup>4</sup>, Thierry Burgeot<sup>4</sup>, Ismaël Bernard<sup>5</sup>, Joop W. P.  
Coolen<sup>6,7</sup>, Jean-Baptiste Lamy<sup>8</sup>, Stéphane Robert<sup>8</sup>, Maria Skazina<sup>9,10</sup>, Petr  
Strelkov<sup>9,10</sup>, Henrique Queiroga<sup>11</sup>, Ibon Cancio<sup>12</sup>, John J. Welch<sup>13</sup>, Frédérique  
Viard<sup>14</sup> and Nicolas Bierne<sup>1</sup>

<sup>1</sup>ISEM, Univ Montpellier, CNRS, EPHE, IRD, Montpellier, France.

<sup>2</sup>Section for Marine Living Resources, National Institute of Aquatic Resources, Technical University of Denmark, Silkeborg, Denmark.

<sup>3</sup>SARL TOXEM, Le Havre, France.

<sup>4</sup>Ifremer Unité Biogéochimie et Écotoxicologie, Centre Atlantique, Nantes.

<sup>5</sup>SAS Eurêka Mer, Lézardrieux, France.

<sup>6</sup>Wageningen Marine Research, P.O. Box 57, 1780 AB Den Helder, The Netherlands.

<sup>7</sup>Wageningen University, Aquatic Ecology and Water Quality Management Group, Droevendaalsesteeg 3a, 6708 PD Wageningen, The Netherlands.

<sup>8</sup>Ifremer, SG2M-LGPMM, Laboratoire de Génétique et Pathologie des Mollusques Marins, La Tremblade, France.

<sup>9</sup>St. Petersburg State University, Universitetskaya Emb. 7/9, St. Petersburg 199034, Russia.

<sup>10</sup>Laboratory of Monitoring and Conservation of Natural Arctic Ecosystems, Murmansk Arctic State University, Kapitana Egorova Str. 16, Murmansk 183038, Russia.

<sup>11</sup>Department of Biology & CESAM, University of Aveiro, Campus Universitário de Santiago, 3810-193 Aveiro, Portugal.

<sup>12</sup>CBET Research Group, Dept. of Zoology and Animal Cell Biology, Fac. Science and Technology and Research Centre for Experimental Marine Biology and Biotechnology (PiE-UPV/EHU), University of the Basque Country (UPV/EHU), Bilbao, Spain.

<sup>13</sup>Department of Genetics, University of Cambridge, Downing St. Cambridge, CB23EH, UK.

<sup>14</sup>Sorbonne Universités, UPMC Univ Paris 06, CNRS, UMR 7144, Department AD2M, Station Biologique, Roscoff, France.

\*Corresponding author: alexis.simon@normalesup.org

March 27, 2019

# Supplementary information

## Contents

|          |                                                   |           |
|----------|---------------------------------------------------|-----------|
| <b>1</b> | <b>Supplementary methods</b>                      | <b>3</b>  |
| <b>2</b> | <b>Supplementary results</b>                      | <b>16</b> |
| 2.1      | Hierarchical population differentiation . . . . . | 16        |
| 2.2      | Ancestry estimation results . . . . .             | 18        |
| 2.3      | Ancestry comparisons . . . . .                    | 29        |
| 2.4      | Linkage disequilibrium . . . . .                  | 30        |
| 2.5      | Newhybrids analyses . . . . .                     | 31        |
| 2.6      | Geographic clines per locus . . . . .             | 34        |
| 2.7      | Correlation of distortions . . . . .              | 37        |
| 2.8      | Estimation of admixture time . . . . .            | 41        |
| <b>3</b> | <b>Additional information</b>                     | <b>42</b> |

# 1 Supplementary methods

Table S1: Population information with sample size after filtration and average missing data among population.

| pop      | longitude | latitude | locality                          | date     | N  | missing data |
|----------|-----------|----------|-----------------------------------|----------|----|--------------|
| Aber     | -2.07349  | 57.14758 | ABD, Aberdeen, Scotland, UK       |          | 74 | 0.0254       |
| Ault     | 1.42314   | 50.09058 | Ault, France                      |          | 36 | 0.0087       |
| B_amont  | 0.14587   | 49.47124 | Bassin Amont, Le Havre, France    |          | 15 | 0.0346       |
| B_aval   | 0.13242   | 49.47447 | Bassin Aval, Le Havre, France     |          | 15 | 0.0165       |
| Barf     | -1.25807  | 49.71015 | Barfleur, France                  | 2015     | 29 | 0.0152       |
| BCF1     |           |          | Backcross                         |          | 72 | 0.0253       |
| BCG      |           |          | Backcross                         |          | 72 | 0.0130       |
| BDC      | 1.42282   | 50.09060 | Bois-de-Cise, France              | 2016     | 30 | 0.0056       |
| Berg     | 5.30573   | 60.39560 | Bergen, Norway                    |          | 21 | 0.0235       |
| BFH      | -72.46253 | 41.26056 | Brandford Harbor, USA             | 2009     | 12 | 0.0162       |
| BIL_001  | -2.49015  | 47.44528 | Le Bile - Penestin, France        | 11/01/17 | 25 | 0.0192       |
| BIL1     | -3.08124  | 43.35194 | Zierbena, Bilbao harbor, Spain    | 17/07/17 | 12 | 0.0097       |
| BIL2     | -3.07939  | 43.35262 | Zierbena, Bilbao harbor, Spain    | 17/07/17 | 12 | 0.0141       |
| BIL3     | -3.03050  | 43.33065 | Santurtzi, Bilbao harbor, Spain   | 17/07/17 | 12 | 0.0097       |
| BIL4     | -3.02976  | 43.33044 | Santurtzi, Bilbao harbor, Spain   | 17/07/17 | 12 | 0.0152       |
| BIL5     | -3.02063  | 43.32557 | Portugalete, Bilbao harbor, Spain | 17/07/17 | 12 | 0.0249       |
| BIL6     | -3.01302  | 43.33165 | Getxo, Bilbao harbor, Spain       | 20/07/17 | 12 | 0.0119       |
| BIL7     | -3.02753  | 43.34187 | Getxo, Bilbao harbor, Spain       | 20/07/17 | 12 | 0.0097       |
| Bizerte  | 9.86000   | 37.26000 | Bizerte, Tunisia                  |          | 12 | 0.0357       |
| BLYT     | -1.49830  | 55.12580 | Blythe, North Sea                 | 14/11/14 | 5  | 0.0961       |
| Bodo     | 14.99857  | 67.21838 | Bodø, Norway                      | 16/11/16 | 38 | 0.0308       |
| Bost     | -71.05000 | 42.36000 | Boston, USA                       | 2009     | 14 | 0.0427       |
| Bouf     | -0.72468  | 49.34802 | Le Bouffay, France                | 2015     | 30 | 0.0156       |
| Brest-1  | -4.28628  | 48.31669 | Lagonna Daoulas, France           | 08/07/17 | 12 | 0.0238       |
| Brest-10 | -4.58798  | 48.27521 | Fishing dock, Camaret, France     | 09/07/17 | 12 | 0.0130       |
| Brest-11 | -4.59713  | 48.27972 | Camaret marina, France            | 09/07/17 | 12 | 0.0162       |
| Brest-12 | -4.61044  | 48.26152 | Veryac'h, France                  | 09/07/17 | 12 | 0.0195       |
| Brest-13 | -4.49673  | 48.22357 | Morgat marina, France             | 09/07/17 | 12 | 0.0087       |
| Brest-14 | -4.46343  | 48.23806 | Postolonnec beach, France         | 09/07/17 | 12 | 0.0087       |
| Brest-15 | -4.36913  | 48.33790 | Porz Tinduff, France              | 24/07/17 | 12 | 0.0173       |

Continued on next page

Table S1 – Continued from previous page

| pop      | longitude | latitude | locality                         | date     | N  | missing data |
|----------|-----------|----------|----------------------------------|----------|----|--------------|
| Brest-16 | -4.41397  | 48.33658 | Lauberlac'h, France              | 24/07/17 | 12 | 0.0206       |
| Brest-17 | -4.44185  | 48.34370 | Anse du Caro, France             | 24/07/17 | 12 | 0.0184       |
| Brest-18 | -4.43723  | 48.35935 | Pointe Marloux, France           | 24/07/17 | 12 | 0.0314       |
| Brest-19 | -4.43067  | 48.39313 | Marina Moulin Blanc Nord, France | 24/07/17 | 12 | 0.0130       |
| Brest-2  | -4.45367  | 48.29334 | Lanvéoc, France                  | 08/07/17 | 12 | 0.0216       |
| Brest-20 | -4.43248  | 48.39002 | Marina Moulin Blanc Sud, France  | 24/07/17 | 11 | 0.0519       |
| Brest-21 | -4.47392  | 48.37994 | Brest commerce A, France         | 25/07/17 | 12 | 0.0335       |
| Brest-22 | -4.47321  | 48.38280 | Brest commerce B, France         | 25/07/17 | 12 | 0.0216       |
| Brest-23 | -4.48110  | 48.37762 | Brest commerce C, France         | 25/07/17 | 12 | 0.0325       |
| Brest-24 | -4.45348  | 48.32235 | Pointe de l'Armorique, France    | 25/07/17 | 11 | 0.0413       |
| Brest-25 | -4.55102  | 48.35945 | Anse de Sainte-Anne, France      | 25/07/17 | 12 | 0.0152       |
| Brest-26 | -4.52923  | 48.36012 | Pointe du Porzic Est, France     | 25/07/17 | 12 | 0.0130       |
| Brest-27 | -4.49093  | 48.37732 | Marina du Chateau A, France      | 25/07/17 | 12 | 0.0152       |
| Brest-28 | -4.48892  | 48.38018 | Marina du Chateau B, France      | 25/07/17 | 11 | 0.0519       |
| Brest-29 | -4.45585  | 48.37470 | Brest commerce D, France         | 25/07/17 | 12 | 0.0206       |
| Brest-3  | -4.50891  | 48.28444 | Le Fret, France                  | 08/07/17 | 12 | 0.0076       |
| Brest-30 | -4.78104  | 48.35904 | Le Conquet, France               | 27/07/17 | 12 | 0.0206       |
| Brest-31 | -4.77214  | 48.34305 | Penzer, France                   | 27/07/17 | 12 | 0.0087       |
| Brest-32 | -4.76820  | 48.32847 | Pointe Saint-Mathieu, France     | 27/07/17 | 12 | 0.0108       |
| Brest-33 | -4.69895  | 48.33888 | Plougonvelin, France             | 27/07/17 | 12 | 0.0292       |
| Brest-34 | -4.61538  | 48.33758 | Petit Minou, France              | 27/07/17 | 12 | 0.0152       |
| Brest-35 | -4.58137  | 48.34809 | Le Mengant, France               | 27/07/17 | 12 | 0.0119       |
| Brest-36 | -4.26814  | 48.27982 | Térénez, France                  | 05/08/17 | 12 | 0.0184       |
| Brest-37 | -4.51477  | 48.20070 | île Vierge, France               | 06/08/17 | 12 | 0.0141       |
| Brest-38 | -4.34048  | 48.40575 | Elorn 2, France                  | 21/09/17 | 7  | 0.0148       |
| Brest-39 | -4.34317  | 48.40582 | Elorn 2B, France                 | 21/09/17 | 12 | 0.0357       |
| Brest-4  | -4.53997  | 48.29194 | L'île du Renard, France          | 08/07/17 | 12 | 0.0065       |
| Brest-40 | -4.34898  | 48.40385 | Elorn St Jean, France            | 21/09/17 | 11 | 0.0153       |
| Brest-41 | -4.35612  | 48.40648 | Elorn 3, France                  | 21/09/17 | 9  | 0.0216       |
| Brest-42 | -4.37208  | 48.39705 | Elorn 6, France                  | 21/09/17 | 12 | 0.0249       |
| Brest-43 | -4.38280  | 48.39553 | Elorn 9, France                  | 21/09/17 | 12 | 0.0216       |
| Brest-44 | -4.38205  | 48.39300 | Elorn 11, France                 | 21/09/17 | 12 | 0.0238       |
| Brest-45 | -4.38670  | 48.39298 | Elorn 14, France                 | 21/09/17 | 12 | 0.0173       |
| Brest-46 | -4.39465  | 48.39028 | Elorn 15, France                 | 21/09/17 | 12 | 0.0184       |

Continued on next page

Table S1 – Continued from previous page

| pop        | longitude | latitude | locality                                   | date     | N  | missing data |
|------------|-----------|----------|--------------------------------------------|----------|----|--------------|
| Brest-5    | -4.54507  | 48.31460 | Roscanvel, France                          | 08/07/17 | 12 | 0.0249       |
| Brest-6    | -4.57300  | 48.30710 | La Fraternité, France                      | 08/07/17 | 12 | 0.0173       |
| Brest-7    | -4.55452  | 48.29658 | Quelern, France                            | 09/07/17 | 12 | 0.0141       |
| Brest-8    | -4.53207  | 48.33974 | Pointe des Espagnols, France               | 09/07/17 | 8  | 0.0568       |
| Brest-9    | -4.58254  | 48.31834 | Îlot des Capucins, France                  | 09/07/17 | 12 | 0.0141       |
| BretN_g1   | -3.71707  | 48.70014 | venizella, Guimaec, France                 |          | 10 | 0.0104       |
| BretN_g2   | -3.69819  | 48.69000 | poul roudou, Locquirec, France             |          | 10 | 0.0078       |
| BretN_g3   | -3.67690  | 48.68796 | lezingar, Locquirec, France                |          | 10 | 0.0104       |
| BretN_g4   | -3.64643  | 48.69481 | pors ar villiec, Locquirec                 |          | 10 | 0.0052       |
| BretN_i1   | -3.54638  | 48.72863 | Léguer estuary, South point, France        |          | 9  | 0.0072       |
| BretN_i2   | -3.54230  | 48.72895 | Banc du Guer sud, France                   |          | 10 | 0.0117       |
| BretN_i3   | -3.58156  | 48.72139 | Locquémo, France                           |          | 10 | 0.0078       |
| BretN_i4   | -3.58371  | 48.72608 | Locquemo, France                           |          | 10 | 0.0065       |
| BretN_i5q1 | -3.58283  | 48.68886 | Beg ar form, Saint-Michel en Grève, France |          | 10 | 0.0091       |
| BretN_i5q2 | -3.58271  | 48.68914 | Beg ar form, Saint-Michel en Grève, France |          | 10 | 0.0039       |
| BretN_i6   | -3.61713  | 48.68507 | Beg Douar, Plestin Les Grèves, France      |          | 10 | 0.0078       |
| BretN_i8   | -3.80425  | 48.72304 | Roc'h Goalen, Plougasnou, France           |          | 10 | 0.0312       |
| CAD        | -6.29842  | 36.52719 | Cadix, Spain                               | 2016     | 15 | 0.0294       |
| Can        | 3.69184   | 43.41226 | Sète, canal, France                        |          | 3  | 0.0909       |
| Cart       | -1.80842  | 49.37165 | Carteret, France                           | 2015     | 29 | 0.0331       |
| CER_001    | -4.44887  | 48.38265 | Brest port, France                         | 14/12/16 | 25 | 0.0135       |
| Cha        | -1.08059  | 46.03229 | Charente, France                           |          | 12 | 0.0119       |
| CHE        | -2.29965  | 47.23232 | Pointe de Chemoulin, France                | 2016     | 30 | 0.0242       |
| CHE_001    | -1.62336  | 49.64574 | Cherbourg, France                          | 02/12/16 | 25 | 0.0156       |
| Cher-A     | -1.61953  | 49.64530 | Cherbourg A, France                        | 01/08/17 | 12 | 0.0227       |
| Cher-B     | -1.61981  | 49.64956 | Cherbourg B, France                        | 01/08/17 | 12 | 0.0249       |
| Cher-C     | -1.63244  | 49.67307 | Cherbourg C, France                        | 01/08/17 | 12 | 0.0390       |
| Cher-D     | -1.62020  | 49.64818 | Cherbourg D, France                        | 01/08/17 | 12 | 0.0487       |
| Cher-E     | -1.62080  | 49.64208 | Cherbourg E, France                        | 01/08/17 | 12 | 0.0433       |
| Cher-F     | -1.62342  | 49.64566 | Cherbourg F, France                        | 01/08/17 | 11 | 0.0342       |
| Cher-G     | -1.61964  | 49.63846 | Cherbourg G, France                        | 01/08/17 | 11 | 0.0614       |
| Cher03     | -1.61994  | 49.63942 | Cherbourg, France                          |          | 30 | 0.0108       |
| Cher15     | -1.62332  | 49.64557 | Cherbourg, France                          | 2015     | 30 | 0.0212       |
| Cher16     | -1.62332  | 49.64557 | Cherbourg, France                          | 2016     | 99 | 0.0365       |

Continued on next page

Table S1 – Continued from previous page

| pop     | longitude | latitude | locality                             | date     | N   | missing data |
|---------|-----------|----------|--------------------------------------|----------|-----|--------------|
| CHR     | -71.51917 | 41.38692 | Charlestown, Snug Harbor Marina, USA | 2009     | 12  | 0.0206       |
| COR     | -8.41393  | 43.37011 | Coruña, Galicia, Spain               | 2016     | 15  | 0.0069       |
| CRE     | -8.97390  | 38.48047 | Praia do Creio, Arrábida, Spain      | 2016     | 15  | 0.0078       |
| Croa    | 13.62091  | 45.07155 | Croatia                              |          | 14  | 0.0547       |
| D15A    | 2.93460   | 54.32470 | D15-A, North Sea                     | 03/10/15 | 8   | 0.1445       |
| Dieppe  | 1.09670   | 49.93556 | Dieppe, France                       |          | 48  | 0.0095       |
| Din     | -2.04937  | 48.63913 | Dinard, France                       |          | 13  | 0.0649       |
| DKL     | -15.93000 | 23.72000 | Dahkla, Morocco                      |          | 10  | 0.1013       |
| Dun     | 2.42178   | 51.10313 | Dunkerque, France                    | 2016     | 30  | 0.0030       |
| Ena11   | -2.07507  | 48.64035 | Saint-Enogat, Dinard, France         |          | 7   | 0.0816       |
| Engl    | -0.93377  | 49.39478 | Englesqueville, France               | 2015     | 30  | 0.0177       |
| EST_001 | -2.53370  | 47.30370 | Le Croisic, France                   |          | 25  | 0.0088       |
| F1      |           |          | F1                                   |          | 6   | 0.0195       |
| F2      |           |          | F2                                   |          | 132 | 0.0364       |
| Far     | -7.93884  | 37.01568 | Faro, Portugal                       |          | 8   | 0.0633       |
| FAR     | -7.93884  | 37.01568 | Faro, Portugal                       | 2016     | 15  | 0.0190       |
| Fer11   | -3.96309  | 48.72045 | ballast ferry                        | 2011     | 38  | 0.0123       |
| Fer13   | -3.96309  | 48.72045 | ballast ferry Armorique              | 16/05/13 | 27  | 0.0077       |
| FINO    | 7.15830   | 55.19500 | FINO 3, North Sea                    | 23/09/15 | 6   | 0.2186       |
| GA      | 6.24164   | 62.46399 | GAS, Gaseid, Alesund, Norway         | 2015     | 36  | 0.0400       |
| Gdansk  | 18.52794  | 54.60956 | Gulf of Gdansk, Poland               | 23/08/12 | 12  | 0.1223       |
| Gran    | -1.59947  | 48.84003 | Granville, France                    | 2015     | 31  | 0.0201       |
| GrCa    | -1.03633  | 49.40803 | Grancamp, France                     | 2015     | 29  | 0.0233       |
| Groix   | -3.45911  | 47.64701 | Groix, France                        |          | 48  | 0.0249       |
| HARW    | 1.28130   | 51.93480 | Harwich, North Sea                   | 15/11/15 | 11  | 0.1181       |
| Havre_A | 0.11327   | 49.48586 | Le Havre, France                     | 2016     | 15  | 0.0069       |
| Havre_B | 0.11612   | 49.47316 | Le Havre, France                     | 2016     | 15  | 0.0303       |
| Havre_C | 0.12268   | 49.47000 | Le Havre, France                     | 2016     | 15  | 0.0130       |
| Havre_D | 0.13867   | 49.46841 | Le Havre, France                     | 2016     | 15  | 0.0139       |
| Havre_E | 0.15604   | 49.46831 | Le Havre, France                     | 2016     | 15  | 0.0104       |
| Havre_F | 0.15841   | 49.47585 | Le Havre, France                     | 2016     | 15  | 0.0095       |
| Havre_G | 0.17341   | 49.47242 | Le Havre, France                     | 2016     | 15  | 0.0087       |
| Havre_H | 0.09767   | 49.48713 | Le Havre, France                     | 2016     | 15  | 0.0052       |
| Havre_I | 0.16510   | 49.45401 | Le Havre, France                     | 2016     | 15  | 0.0173       |

Continued on next page

Table S1 – Continued from previous page

| pop     | longitude | latitude | locality                                  | date     | N  | missing data |
|---------|-----------|----------|-------------------------------------------|----------|----|--------------|
| Havre-J | 0.11832   | 49.48893 | Le Havre, France                          | 02/07/17 | 15 | 0.0502       |
| Her     | 25.14420  | 35.33800 | Heraklion, Greece                         |          | 35 | 0.0171       |
| Holl    | 5.42400   | 53.31000 | Wadden Sea, The Netherlands               |          | 23 | 0.0056       |
| HORN    | 7.81100   | 55.47890 | Horns Rev, North Sea                      | 10/06/15 | 2  | 0.1299       |
| HOU_001 | -2.93723  | 47.41967 | Ile de Houat, France                      | 10/01/17 | 25 | 0.0192       |
| JapSea  | 135.09238 | 38.73579 | Katolikova, Japan Sea                     |          | 16 | 0.1631       |
| Jer     | -2.02038  | 49.17308 | JER, Jersey, France                       | 2016     | 30 | 0.0143       |
| JUM     | -3.90044  | 47.83397 | La Jument, France                         | 2016     | 30 | 0.0104       |
| K10B    | 3.25390   | 53.36260 | K10-B, North Sea                          | 01/10/14 | 8  | 0.1591       |
| KOR     | 128.44707 | 34.83393 | South Korea                               |          | 10 | 0.1169       |
| L4      | -4.57230  | 48.28220 | bay of Brest (Camaret), France            | 24/04/17 | 42 | 0.0247       |
| L5      | -4.48815  | 48.37733 | bay of Brest (port), France               | 24/04/17 | 49 | 0.0358       |
| LaRochA | -1.22359  | 46.14988 | La Rochelle, France                       | 24/06/17 | 7  | 0.1410       |
| LaRochB | -1.22449  | 46.15045 | La Rochelle, France                       | 25/06/17 | 29 | 0.0636       |
| LeHaCM  | 0.11380   | 49.45725 | Le Havre, France                          | 2017     | 14 | 0.0241       |
| LeHaP1  | 0.10579   | 49.46466 | Le Havre P1, France                       | 2017     | 15 | 0.0277       |
| LeHaP10 | 0.17332   | 49.45352 | Le Havre P10, France                      | 2017     | 14 | 0.0473       |
| LeHaP11 | 0.17807   | 49.45456 | Le Havre P11, France                      | 2017     | 15 | 0.0857       |
| LeHaP2  | 0.10996   | 49.46040 | Le Havre P2, France                       | 2017     | 15 | 0.0199       |
| LeHaP3  | 0.11473   | 49.45825 | Le Havre P3, France                       | 2017     | 15 | 0.0156       |
| LeHaP4  | 0.12137   | 49.45734 | Le Havre P4, France                       | 2017     | 15 | 0.0216       |
| LeHaP5  | 0.13330   | 49.45634 | Le Havre P5, France                       | 2017     | 15 | 0.0727       |
| LeHaP6  | 0.14413   | 49.45546 | Le Havre P6, France                       | 2017     | 15 | 0.0355       |
| LeHaP7  | 0.15224   | 49.45185 | Le Havre P7, France                       | 2017     | 15 | 0.0268       |
| LeHaP8  | 0.16015   | 49.45441 | Le Havre P8, France                       | 2017     | 15 | 0.0268       |
| LeHaP9  | 0.16602   | 49.45376 | Le Havre P9, France                       | 2017     | 15 | 0.0502       |
| LISB    | -9.09260  | 38.76350 | Lisbon, Portugal                          | 14/02/15 | 5  | 0.1818       |
| LochEti | -5.18317  | 56.45735 | Loch Etive, Scotland, UK                  |          | 11 | 0.1145       |
| Locq    | -3.59720  | 48.73691 | Locquemeau, France                        |          | 37 | 0.0190       |
| LOF     | 13.87800  | 68.33800 | Lofoten, Norway                           | 2014     | 43 | 0.0417       |
| MAB_001 | -2.21610  | 46.99760 | Maison Blanche, Noirmoutier, France       |          | 25 | 0.0088       |
| MAK     | 22.61232  | 40.41618 | Makrigiallos, Greece                      |          | 6  | 0.1017       |
| MOU     | -4.04187  | 47.84282 | Pointe de Mousterlin, France              | 2016     | 30 | 0.0242       |
| Murch   | 1.75000   | 61.40000 | MCH, Murchison oil station, Norwegian Sea |          | 12 | 0.0465       |

Continued on next page

Table S1 – Continued from previous page

| pop          | longitude | latitude | locality                                              | date     | N  | missing data |
|--------------|-----------|----------|-------------------------------------------------------|----------|----|--------------|
| NUS          | -51.71040 | 64.19680 | Nuuk, Greenland                                       | 2014     | 28 | 0.0756       |
| NY-harb-A    | -73.79327 | 40.79521 | NYC Throgs Neck Bridge, USA                           | 09/06/04 | 9  | 0.0534       |
| NY-harb-B    | -71.94682 | 41.02913 | Montauk, USA                                          | 23/02/14 | 7  | 0.0686       |
| NY-harb-C    | -74.01726 | 40.65532 | Brooklyn piers, USA                                   |          | 10 | 0.0260       |
| ORT          | -7.80508  | 43.72246 | Ortigueira, Galicia, Spain                            | 2016     | 15 | 0.0139       |
| OST          | -72.38419 | 41.26328 | Old Saybrook town, Hartland drive, USA                | 2009     | 24 | 0.0211       |
| Ostende      | 2.91815   | 51.23815 | Ostende, Belgium                                      |          | 29 | 0.0090       |
| Ouis         | -0.45892  | 49.33829 | Ouistreham, France                                    | 2015     | 30 | 0.0203       |
| Palice-A     | -1.21576  | 46.15909 | La Palice, Bassin à flot, France                      | 23/02/18 | 18 | 0.0065       |
| Palice-B     | -1.21843  | 46.15854 | La Palice, lock, France                               | 23/02/18 | 76 | 0.0106       |
| PEN          | -2.51383  | 47.30632 | Barres de Pen Bron, France                            | 2016     | 30 | 0.0212       |
| PEN_001      | -2.49363  | 47.49712 | Camaret plage-Penestin, France                        | 11/01/17 | 25 | 0.0223       |
| Peniche      | -9.37944  | 39.36844 | Peniche, Portugal                                     | 2016     | 15 | 0.0121       |
| PET_001      | -4.47146  | 48.38119 | Brest port, France                                    | 14/12/16 | 25 | 0.0151       |
| Pir          | -1.60083  | 49.16588 | Pirou, France                                         | 2016     | 30 | 0.0074       |
| POU_001      | -2.41596  | 47.26029 | Le Pouliguen - La Baule, France                       | 12/01/17 | 25 | 0.0119       |
| Prim         | -3.82080  | 48.72122 | Primel, France                                        |          | 36 | 0.0177       |
| PtArm97      | -4.45355  | 48.32563 | Pointe de l'Armorique, plage des ducs d'albes, France |          | 19 | 0.0444       |
| Q13A         | 4.13610   | 52.19110 | Q13-A, North Sea                                      | 28/05/14 | 12 | 0.0617       |
| QAS          | -69.24030 | 77.46500 | Qaanaaq, Greenland                                    | 2014     | 30 | 0.1364       |
| RadeBrest_R1 | -4.39973  | 48.39014 | Pont d'Iroise, France                                 |          | 10 | 0.0195       |
| RadeBrest_R2 | -4.36882  | 48.33810 | Port du Tinduff, France                               |          | 10 | 0.0169       |
| RadeBrest_R3 | -4.50680  | 48.28679 | Le Fret, France                                       |          | 10 | 0.0091       |
| RadeBrest_R4 | -4.55083  | 48.30609 | Quélern, Roscanvel, France                            |          | 10 | 0.0104       |
| RadeBrest_R5 | -4.57194  | 48.28199 | Pte Ste Barbe, Camaret, France                        |          | 10 | 0.0104       |
| Rave         | -1.21023  | 49.47333 | Ravenoville, France                                   | 2015     | 30 | 0.0130       |
| Revi         | -1.22933  | 49.57467 | Réville, France                                       | 2015     | 30 | 0.0160       |
| ROC_VER      | -1.40556  | 45.98358 | Rocher Vert Chaucre cote ouest Oléron, France         | 05/10/16 | 25 | 0.0151       |
| RoRo         | -3.38314  | 48.81866 | Roc-Rouge, France                                     |          | 32 | 0.0114       |
| Roth         | -1.96213  | 48.68703 | Rothéneuf, France                                     |          | 32 | 0.0288       |
| SB1          | -2.71614  | 48.55568 | Pointe du Roselier, France                            |          | 10 | 0.0039       |
| SB2          | -2.78885  | 48.58458 | Pordic, plage du petit havre, France                  |          | 10 | 0.0052       |
| SCHV         | 4.25820   | 52.09870 | Scheveningen, North Sea                               | 08/07/14 | 1  | 0.0779       |
| SoRo         | -1.55248  | 48.73239 | Sol-Roc, France                                       |          | 30 | 0.0472       |

Continued on next page



Table S1 – *Continued from previous page*

| pop       | longitude | latitude | locality                                 | date     | N  | missing data |
|-----------|-----------|----------|------------------------------------------|----------|----|--------------|
| StAnd     | 0.07980   | 49.54744 | Saint-Andrieux, France                   |          | 15 | 0.0087       |
| StJo      | 0.15264   | 49.64395 | Saint-Jouin, France                      | 2015     | 27 | 0.0106       |
| StLau-CBD | -69.46615 | 48.26941 | Saint Lawrence, Cap de Bon Désir, Canada |          | 9  | 0.1010       |
| StLau-TD  | -69.69614 | 48.13441 | Saint Lawrence, Tadoussac, Canada        |          | 12 | 0.1180       |
| StMalo    | -2.02165  | 48.64855 | Saint-Malo port, France                  | 16/07/17 | 30 | 0.0156       |
| StNaz-I   | -2.19894  | 47.27074 | Saint-Nazaire, France                    | 30/01/18 | 26 | 0.0080       |
| StNaz-II  | -2.20027  | 47.27391 | Saint-Nazaire, France                    | 30/01/18 | 25 | 0.0348       |
| StNaz-III | -2.20259  | 47.27312 | Saint-Nazaire, France                    | 30/01/18 | 25 | 0.0358       |
| StNaz-IV  | -2.19813  | 47.28964 | Saint-Nazaire, France                    | 30/01/18 | 26 | 0.0330       |
| StNaz-V   | -2.19880  | 47.27941 | Saint-Nazaire, France                    | 30/01/18 | 26 | 0.0280       |
| SV1       | 11.13620  | 79.11230 | Svalbard – Kongsfjorden, Norway          | 2012     | 6  | 0.0455       |
| SV2       | 11.13620  | 79.11230 | Svalbard – Kongsfjorden, Norway          | 2013     | 9  | 0.0505       |
| SV3       | 11.13620  | 79.11230 | Svalbard – Kongsfjorden, Norway          | 2014     | 12 | 0.0649       |
| SV4       | 15.60260  | 78.23810 | Svalbard – Adventfjorden, Norway         | 2014     | 11 | 0.0106       |
| Tatihou   | -1.23627  | 49.58673 | Tatihou, France                          | 09/07/05 | 24 | 0.0076       |
| Th16      | 3.69179   | 43.41227 | Thau, France                             | 2016     | 23 | 0.0169       |
| TH16B     | 3.68782   | 43.41474 | Thau, ponton station, France             | 2016     | 18 | 0.0043       |
| VHO       | -8.82312  | 37.38853 | Vale dos Homens, Aljezur, Spain          | 2016     | 15 | 0.0078       |
| VIG       | -8.70214  | 42.26008 | Vigo, Spain                              | 2016     | 15 | 0.0104       |
| Vill      | 0.11605   | 49.39935 | Villerville, France                      | 2015     | 30 | 0.0251       |
| VILL      | 0.12383   | 49.40374 | Villerville, France                      | 2016     | 30 | 0.0108       |
| Vill16    | 0.12351   | 49.40369 | Villerville, France                      | 2016     | 15 | 0.0035       |
| VLR       | 0.79465   | 49.87812 | Veules-les-Roses, France                 | 2016     | 30 | 0.0052       |
| Wim       | 1.60307   | 50.77263 | Wimereux, France                         | 2016     | 29 | 0.0049       |

*Continued on next page*

Table S2: Softwares and R packages used in this study

| <b>software</b> | <b>version</b> | <b>reference</b>                          | <b>link</b>                                                                                                                                 |
|-----------------|----------------|-------------------------------------------|---------------------------------------------------------------------------------------------------------------------------------------------|
| R               | 3.5.2          | R Core Team 2018                          | <a href="https://www.r-project.org/">https://www.r-project.org/</a>                                                                         |
| Python          | 3.7.1          | -                                         | <a href="https://www.python.org/">https://www.python.org/</a>                                                                               |
| Structure       | 2.3.4          | Pritchard et al. 2000; Falush et al. 2003 | <a href="https://web.stanford.edu/group/pritchardlab/structure.html">https://web.stanford.edu/group/pritchardlab/structure.html</a>         |
| Admixture       | 1.3.0          | Alexander and Lange 2011                  | <a href="http://software.genetics.ucla.edu/admixture/">http://software.genetics.ucla.edu/admixture/</a>                                     |
| CLUMPAK         | 1.1            | Kopelman et al. 2015                      | <a href="http://clumpak.tau.ac.il/">http://clumpak.tau.ac.il/</a>                                                                           |
| QGIS            | 3.4.2          | -                                         | <a href="https://qgis.org/fr/site/">https://qgis.org/fr/site/</a>                                                                           |
| Newhybrids      | 1.1 beta 3     | Anderson and Thompson 2002                | <a href="http://ib.berkeley.edu/labs/slatkin/eriq/software/software.htm">http://ib.berkeley.edu/labs/slatkin/eriq/software/software.htm</a> |

| <b>R package</b>      | <b>version</b> | <b>reference</b>                     |
|-----------------------|----------------|--------------------------------------|
| tidyverse             | 1.2.1          | Wickham 2017                         |
| reshape2              | 1.4.3          | Wickham 2007                         |
| adegenet              | 2.1.1          | Jombart 2008; Jombart and Ahmed 2011 |
| pegas                 | 0.11           | Paradis 2010                         |
| hierfstat             | 0.04-22        | Goudet and Jombart 2015              |
| introgres             | 1.2.3          | Gompert and Buerkle 2010             |
| qtl                   | 1.44-9         | Broman et al. 2003                   |
| LDheatmap             | 0.99-5         | Shin et al. 2006                     |
| genetics              | 1.3.8.1        | Warnes et al. 2013                   |
| ggpubr                | 0.2            | Kassambara 2018                      |
| psych                 | 1.8.12         | Revelle 2018                         |
| EmpiricalBrownsMethod | 1.10.0         | Poole et al. 2016                    |
| ggstatsplots          | 0.0.9          | Patil 2019                           |
| foreach               | 1.4.4          | Microsoft and Weston 2017            |
| doMC                  | 1.3.5          | Analytics and Weston 2017            |

Table S3: Across all analyses multiple selection threshold have been used to select either individuals or markers for specific analyses. Decision thresholds are presented in table S3. For statistical tests we chose  $\alpha = 0.05$  as the significant threshold.

| Variable used                      | for what?                                                   | with what?                                                      | kept if                                                                      |
|------------------------------------|-------------------------------------------------------------|-----------------------------------------------------------------|------------------------------------------------------------------------------|
| Missing data of individuals        | full dataset                                                | genotypes                                                       | $< 30\%$                                                                     |
|                                    | genetic map F2                                              | genotypes                                                       | $< 10\%$                                                                     |
| Missing data of markers            | full dataset                                                | genotypes                                                       | $< 10\%$                                                                     |
|                                    | $F_{ST}$ between reference populations                      | genotypes of <i>M. trossulus</i> pop. only                      | $< 30\%$                                                                     |
| Q value or prob. of membership (C) | reference groups filtration <i>M. trossulus</i> individuals | Admixture $K = 3$ (fig. S4)<br>full Structure $K = 5$ (fig. S5) | $Q > 85\%$ from putative cluster<br>$Q_{tros} > 0.1$                         |
|                                    | list of dock mussels                                        | Structure local w/o admixture $K = 3$ (fig. S20)                | $\in (\text{Port}) \wedge \in (C_{dock} > 0.9)$                              |
|                                    | list of <i>M. edulis</i> in ports                           | Structure local w/o admixture $K = 3$                           | $\in (\text{Port}) \wedge \in (C_{edu} > 0.5)$                               |
|                                    | list of gallo_atl in ports                                  | Structure local w/o admixture $K = 3$                           | $\in (\text{Port}) \wedge \in (C_{gallo\_atl} > 0.5)$                        |
|                                    | list of admix gallo_atl                                     | Structure w/o admixture $K = 5$ (fig. S19)                      | $\in (\text{focal pop.}) \wedge \in (C_{gallo\_atl} + C_{admix\_atl} > 0.9)$ |

Table S4: Reference panel groups and populations

| L1    | L2        | L3             | pop            | N              |                |         |    |
|-------|-----------|----------------|----------------|----------------|----------------|---------|----|
| edu   | edu_am    | edu_am         | Bost           | 14             |                |         |    |
|       |           |                | CHR            | 12             |                |         |    |
|       |           |                | OST            | 24             |                |         |    |
|       | edu_eu    | edu_eu_south   | Dun (ext)      | 29             |                |         |    |
|       |           |                | Holl (ext)     | 23             |                |         |    |
|       |           |                | Ostende (ext)  | 28             |                |         |    |
|       |           |                | Wim (ext)      | 29             |                |         |    |
|       |           |                | Cha (int)      | 12             |                |         |    |
|       |           |                |                |                |                |         |    |
|       |           | edu_eu_north   | Bodo           | 38             |                |         |    |
|       |           | Berg           | 38             |                |                |         |    |
| gallo | gallo_atl | gallo_atl_iber | CAD            | 15             |                |         |    |
|       |           |                | COR            | 15             |                |         |    |
|       |           |                | CRE            | 15             |                |         |    |
|       |           |                | DKL            | 10             |                |         |    |
|       |           |                | Far            | 8              |                |         |    |
|       |           |                | FAR            | 14             |                |         |    |
|       |           |                | ORT            | 15             |                |         |    |
|       |           |                | Peniche        | 15             |                |         |    |
|       |           |                | VHO            | 15             |                |         |    |
|       |           |                | VIG            | 15             |                |         |    |
|       |           |                |                |                |                |         |    |
|       |           |                |                | gallo_atl_brit | Prim           | 36      |    |
|       |           |                |                | gallo_med      | gallo_med_east | Croa    | 14 |
|       |           |                |                |                |                | Her     | 35 |
|       |           |                |                |                |                | MAK     | 6  |
|       |           |                |                | gallo_med_west |                | Can     | 3  |
|       |           |                |                |                |                | Th16    | 23 |
|       |           |                |                |                |                | TH16B   | 18 |
|       |           |                |                |                |                | Bizerte | 12 |
| tros  | tros_am   | tros_am        | LochEti        | 11             |                |         |    |
|       |           |                | StLau-CBD      | 9              |                |         |    |
|       |           |                | StLau-TD       | 11             |                |         |    |
|       |           | tros_eu        | tros_eu_baltic | Gdansk         | 12             |         |    |
|       |           | tros_pac       | tros_pac_west  | JapSea         | 16             |         |    |

Table S5: Linkage map – (i) genetic map produced from lab F2 crosses, (ii) markers on the same contig and (iii) left markers with unknown relation.

|       | locus                                    | linkage group      | position (cM) | unlinked set |
|-------|------------------------------------------|--------------------|---------------|--------------|
|       | 063                                      | 1                  | 0.00          | •            |
|       | 067                                      | 1                  | 22.88         |              |
|       | 607                                      | 1                  | 24.23         |              |
|       | 062                                      | 1                  | 25.11         | •            |
|       | 210                                      | 1                  | 28.33         |              |
|       | 055                                      | 1                  | 28.77         |              |
|       | 034                                      | 1                  | 31.99         |              |
|       | 115                                      | 1                  | 32.44         |              |
|       | 064                                      | 2                  | 0.00          |              |
|       | 026                                      | 2                  | 1.36          |              |
|       | 047                                      | 2                  | 1.36          |              |
|       | 160                                      | 2                  | 1.36          | •            |
|       | 161                                      | 2                  | 3.65          |              |
|       | 052                                      | 3                  | 0.00          | •            |
|       | 007                                      | 3                  | 9.70          |              |
|       | 610                                      | 3                  | 27.41         |              |
|       | 015                                      | 4                  | 0.00          |              |
| (i)   | 155                                      | 4                  | 2.29          | •            |
|       | 900                                      | 4                  | 14.32         |              |
|       | 142                                      | 5                  | 0.00          |              |
|       | 148                                      | 5                  | 3.22          |              |
|       | 184                                      | 5                  | 3.22          | •            |
|       | 061                                      | 6                  | 0.00          |              |
|       | 080                                      | 6                  | 10.00         | •            |
|       | 082                                      | 7                  | 0.00          | •            |
|       | 802                                      | 7                  | 10.00         |              |
|       | 144                                      | 8                  | 0.00          |              |
|       | 145                                      | 8                  | 10.00         | •            |
|       | 001                                      | 9                  | 0.00          | •            |
|       | 022                                      | 10                 | 0.00          | •            |
|       | 073                                      | 11                 | 0.00          | •            |
|       | 094                                      | 12                 | 0.00          | •            |
|       | 164                                      | 13                 | 0.00          | •            |
|       | 180                                      | 14                 | 0.00          | •            |
|       | 211                                      | 15                 | 0.00          | •            |
|       | 617                                      | 16                 | 0.00          | •            |
|       | 202                                      | R_L02_mira_Contig1 | 2420 (bp)     | •            |
| (ii)  | 602                                      | R_L02_mira_Contig1 | 3684 (bp)     |              |
|       | 604                                      | R_L02_mira_Contig1 | 6232 (bp)     |              |
| (iii) | All other markers not in the linkage map |                    |               | •            |

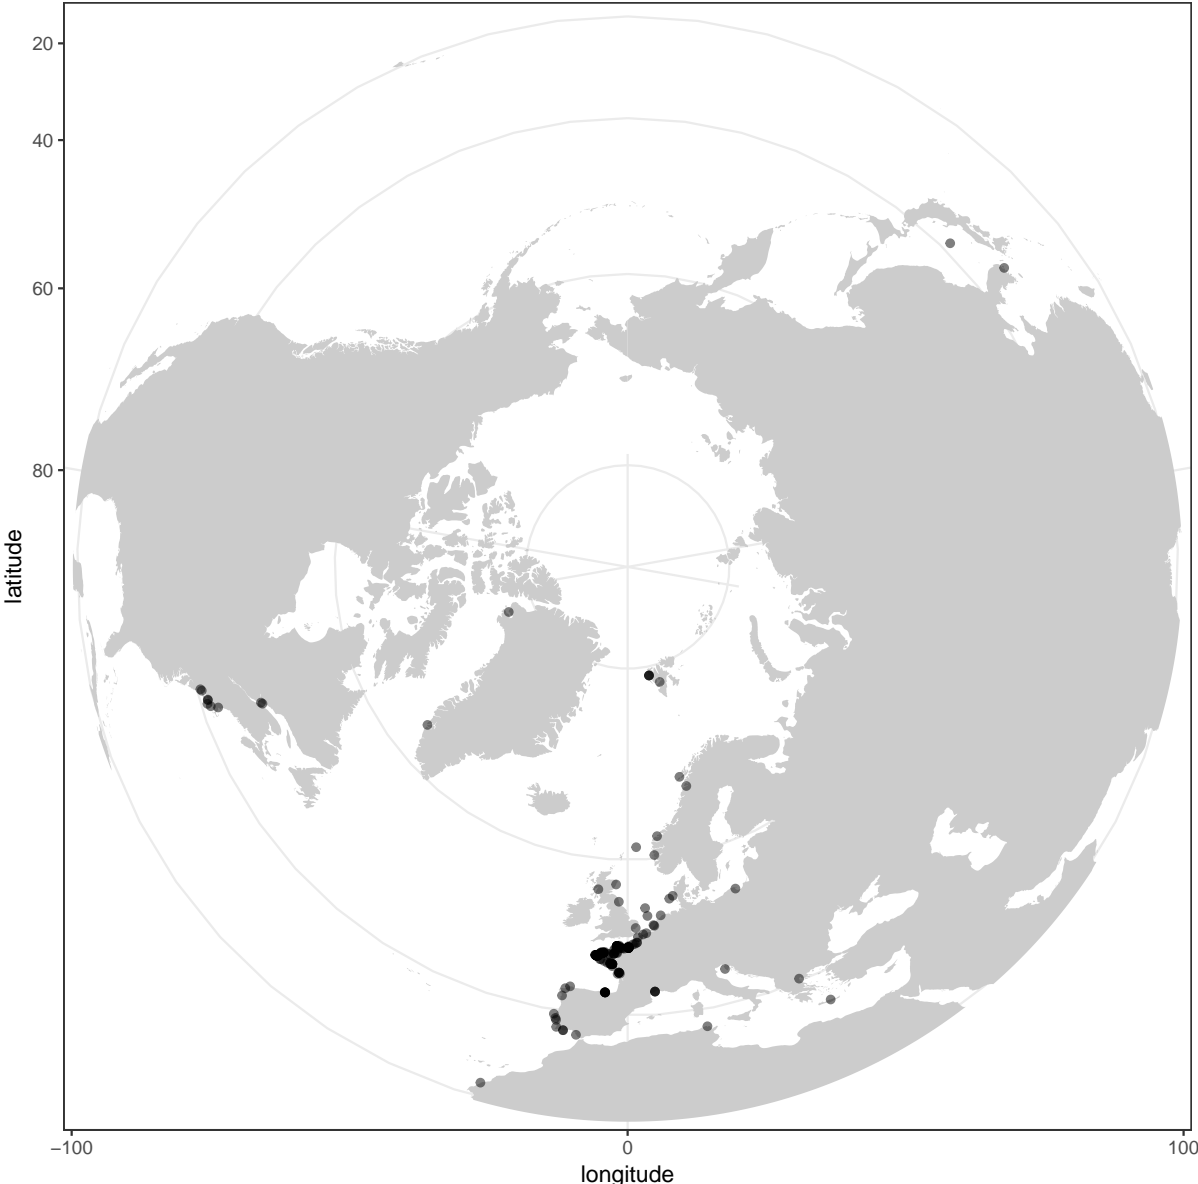

Figure S1: Location of all samples considered in the study.

## Steps data

|                                                                                     |                   |                          |                      |
|-------------------------------------------------------------------------------------|-------------------|--------------------------|----------------------|
|    | Tip1              | 96 DW tip comb           |                      |
|    | Pick-Up           | Tip Plate                |                      |
|    | Bind              | Sample                   |                      |
|                                                                                     | Beginning of step | Precollect               | No                   |
|                                                                                     |                   | Release time, speed      | 00:00:30, Bottom mix |
|                                                                                     | Mixing / heating: | Mixing time, speed       | 00:04:30, Half mix   |
|                                                                                     |                   | Heating during mixing    | No                   |
|                                                                                     | End of step       | Postmix                  | No                   |
|                                                                                     |                   | Collect count            | 3                    |
|                                                                                     |                   | Collect time [s]         | 1                    |
|    | Wash 1            | MB3                      |                      |
|                                                                                     | Beginning of step | Precollect               | No                   |
|                                                                                     |                   | Release time, speed      | 00:00:10, Bottom mix |
|                                                                                     | Mixing / heating: | Mixing time, speed       | 00:01:00, Half mix   |
|                                                                                     |                   | Heating during mixing    | No                   |
|                                                                                     | End of step       | Postmix                  | No                   |
|                                                                                     |                   | Collect count            | 3                    |
|                                                                                     |                   | Collect time [s]         | 1                    |
|    | Wash 2            | MB4                      |                      |
|                                                                                     | Beginning of step | Precollect               | No                   |
|                                                                                     |                   | Release time, speed      | 00:00:10, Bottom mix |
|                                                                                     | Mixing / heating: | Mixing time, speed       | 00:01:00, Half mix   |
|                                                                                     |                   | Heating during mixing    | No                   |
|                                                                                     | End of step       | Postmix                  | No                   |
|                                                                                     |                   | Collect count            | 3                    |
|                                                                                     |                   | Collect time [s]         | 1                    |
|  | Wash 3            | MB5                      |                      |
|                                                                                     | Beginning of step | Precollect               | No                   |
|                                                                                     |                   | Release beads            | No                   |
|                                                                                     | Mixing / heating: | Mixing time, speed       | 00:00:30, Slow       |
|                                                                                     |                   | Heating during mixing    | No                   |
|                                                                                     | End of step       | Postmix                  | No                   |
|                                                                                     |                   | Collect beads            | No                   |
|  | Elution           | Elution                  |                      |
|                                                                                     | Beginning of step | Precollect               | No                   |
|                                                                                     |                   | Release time, speed      | 00:00:15, Bottom mix |
|                                                                                     | Mixing / heating: | Shake 1 time, speed      | 00:01:00, Medium     |
|                                                                                     |                   | Shake 2 time, speed      | 00:00:10, Bottom mix |
|                                                                                     |                   | Loop count               | 8                    |
|                                                                                     |                   | Heating temperature [°C] | 72                   |
|                                                                                     |                   | Preheat                  | Yes                  |
|                                                                                     | End of step       | Postmix                  | No                   |
|                                                                                     |                   | Collect count            | 3                    |
|                                                                                     |                   | Collect time [s]         | 30                   |
|  | ReleaseBeads1     | MB5                      |                      |
|                                                                                     |                   | Release time, speed      | 00:00:10, Half mix   |
|  | Leave             | MB5                      |                      |

Figure S2: Program for DNA extraction with the Kingfisher Flex robot.

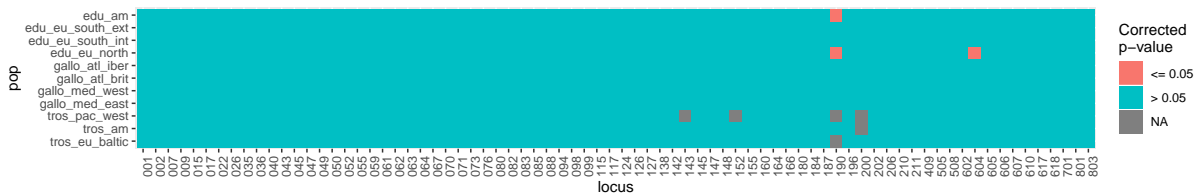

Figure S3: Hardy-Weinberg equilibrium test in each reference population. Benjamini-Yekutieli corrected  $p$  values are used.

## Admixture time

To estimate simply admixture time, Structure runs were used as indicated in Falush et al. (2003) using the linkage model. For each port (or year for Cherbourg) only admixed dock mussels individuals were considered with additional reference populations being edu\_eu\_south and gallo\_med. The popflag column was set to 1 for reference individuals to better estimate the parental allele frequencies. Only markers on the genetic map were used to avoid bias through undetected linkage with markers that could not be included in the genetic map analysis. Options used: LINKAGE = 1, PFROMPOPFLAGONLY = 1, NOADMIX = 0, LOG10RSTART = -2, LOG10RMIN = -3, LOG10RMAX = 2, LOG10RPROPSD = 0.1. See the parameter files for more details. Results of average  $r$  for 25 runs are presented in table S10, the number of generations is given by  $r \times 100$  as genetic distance are given in cM.

## 2 Supplementary results

### 2.1 Hierarchical population differentiation

#### General Note

| $p$ value          | symbol |
|--------------------|--------|
| $p < 0.001$        | ***    |
| $0.001 < p < 0.01$ | **     |
| $0.01 < p < 0.05$  | *      |
| $p > 0.05$         | ns     |

When statistically significant, results are presented in bold.



Table S6: Fst values between reference groups

| Level | group 1          | group 2          | $F_{ST}$         |
|-------|------------------|------------------|------------------|
| L1    | edu              | gallo            | <b>0.8127***</b> |
|       | edu              | tros             | <b>0.7226***</b> |
|       | gallo            | tros             | <b>0.8086***</b> |
| L2    | gallo_med        | gallo_atl        | <b>0.3823***</b> |
|       | edu_eu           | edu_am           | <b>0.4845***</b> |
| L3    | gallo_med_west   | gallo_med_east   | <b>0.0586***</b> |
|       | edu_eu_south_int | edu_eu_south_ext | 0.0024 (ns)      |
|       | edu_eu_south_int | edu_eu_north     | <b>0.2086***</b> |
|       | edu_eu_south_ext | edu_eu_north     | <b>0.3129***</b> |
|       | gallo_atl_ext    | gallo_atl_int    | <b>0.1555***</b> |

Table S7: Fst values and significance between ports

|        | cher             | havre            | brest           | stmalo      |
|--------|------------------|------------------|-----------------|-------------|
| havre  | <b>0.0235***</b> |                  |                 |             |
| brest  | <b>0.0046***</b> | <b>0.0245***</b> |                 |             |
| stmalo | 0.0078 (ns)      | <b>0.0390***</b> | 0.0058 (ns)     |             |
| stnaz  | 0.0071 (ns)      | <b>0.0304***</b> | <b>0.0067**</b> | 0.0043 (ns) |

Table S8: Fst values and significance between Cherbourg years

|        | cher03          | cher15       | cher16       |
|--------|-----------------|--------------|--------------|
| cher15 | <b>0.0066**</b> |              |              |
| cher16 | <b>0.0097*</b>  | 0.0009 (ns)  |              |
| cher17 | 0.0032 (ns)     | -0.0017 (ns) | -0.0007 (ns) |

Table S9: Fst values and significance between admixed populations with Atlantic *M. gallo-provincialis*

|      | ABD              | HZSB             | GAS         | JER            | LOF         |
|------|------------------|------------------|-------------|----------------|-------------|
| HZSB | <b>0.0429***</b> |                  |             |                |             |
| GAS  | <b>0.0736*</b>   | <b>0.1021*</b>   |             |                |             |
| JER  | <b>0.0974***</b> | <b>0.1439***</b> | 0.0335 (ns) |                |             |
| LOF  | <b>0.0372***</b> | <b>0.0743***</b> | 0.0047 (ns) | 0.0414 (ns)    |             |
| MCH  | 0.0346 (ns)      | 0.0462 (ns)      | 0.1795 (ns) | <b>0.2330*</b> | 0.1163 (ns) |

## 2.2 Ancestry estimation results

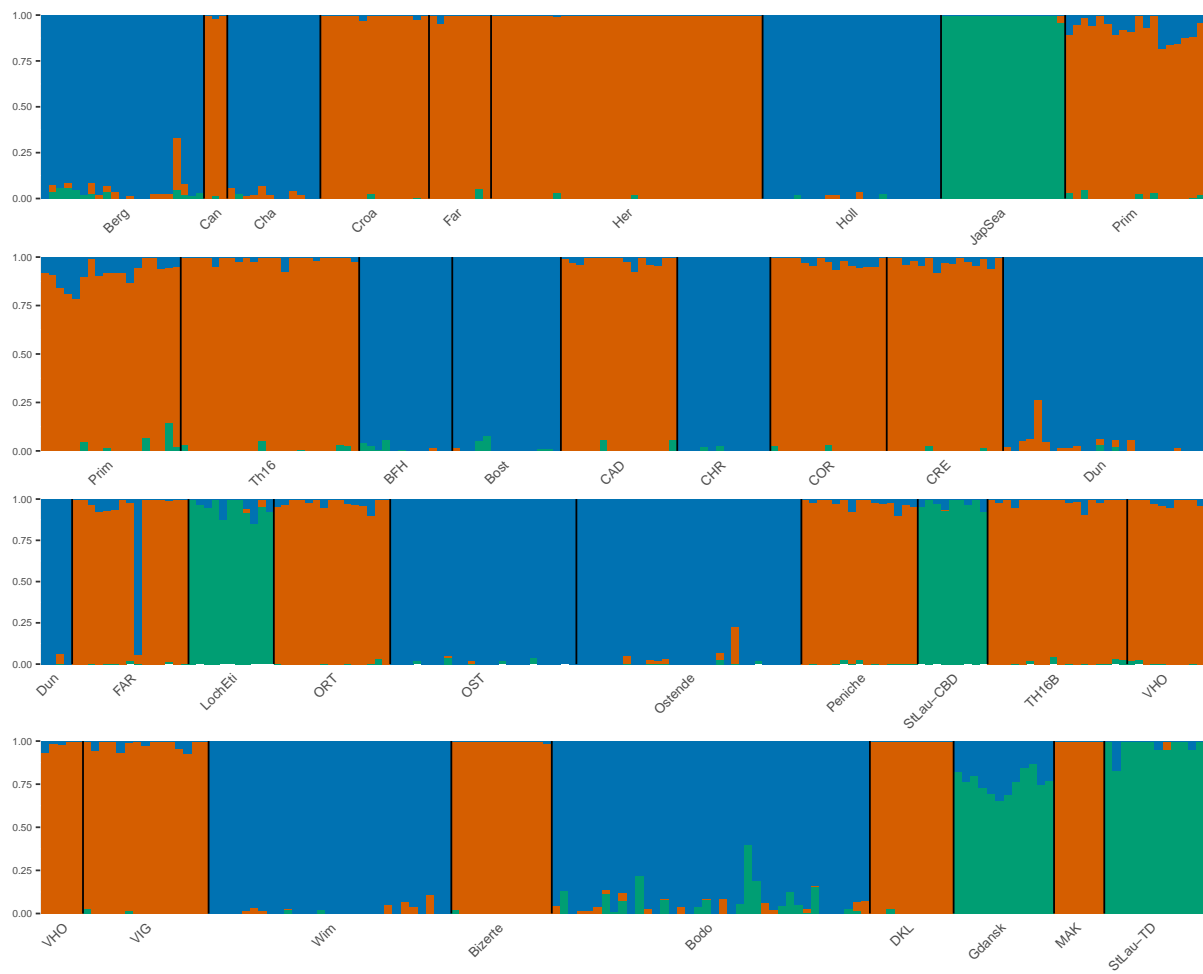

Figure S4: Admixture results for reference groups,  $K = 3$ , before filtration.

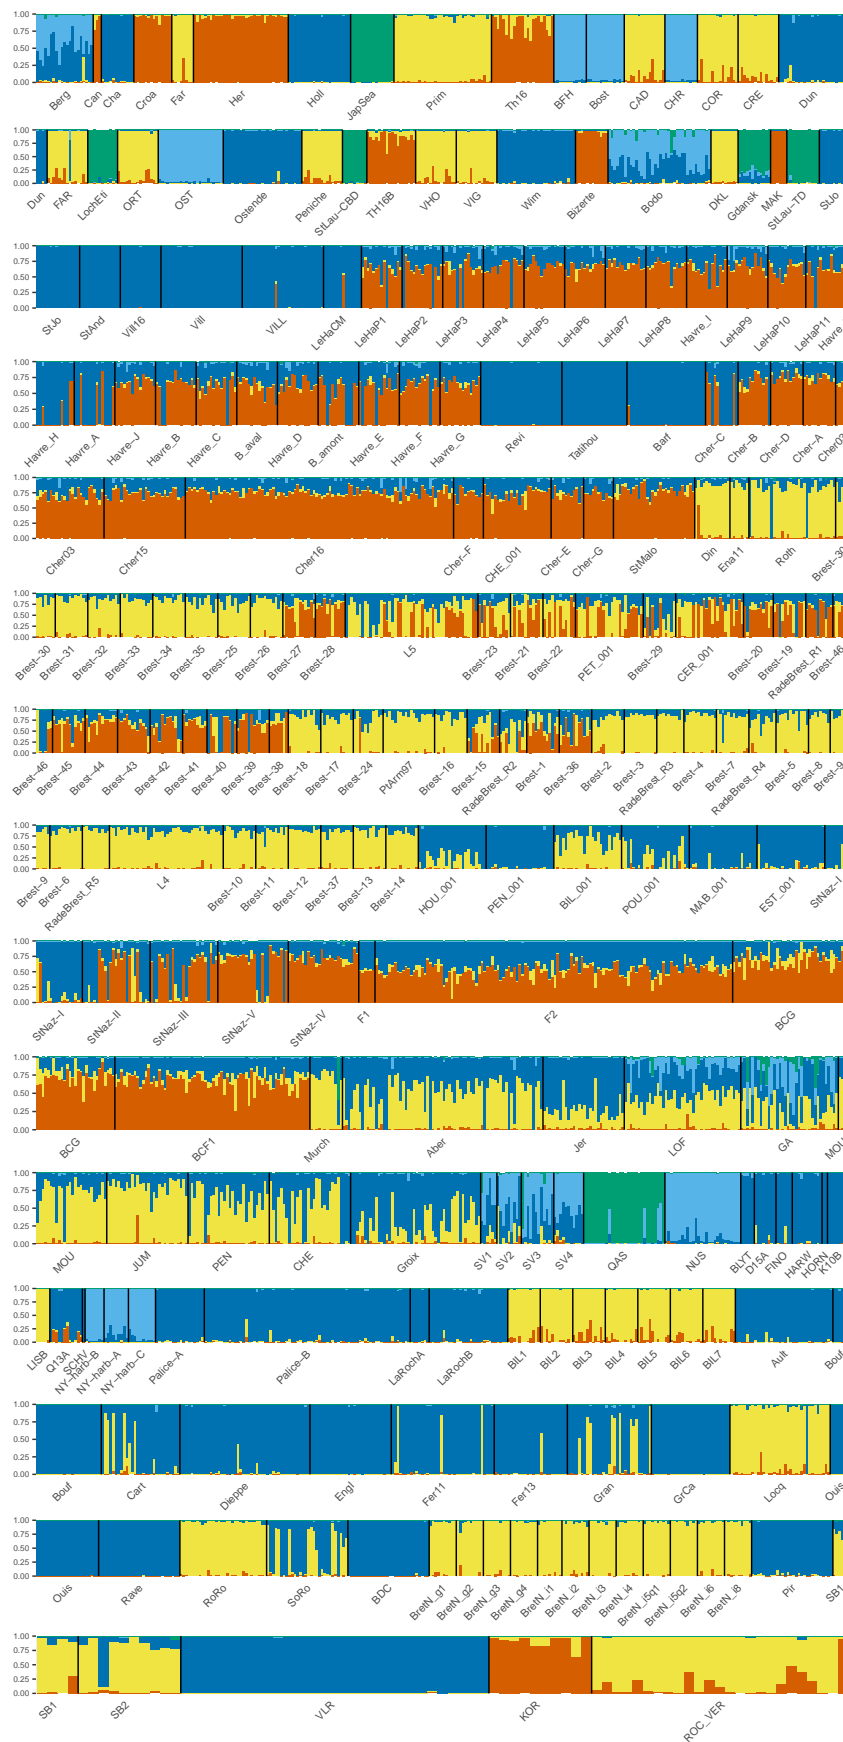

Figure S5: Structure results with all individuals,  $K = 6$  major cluster.

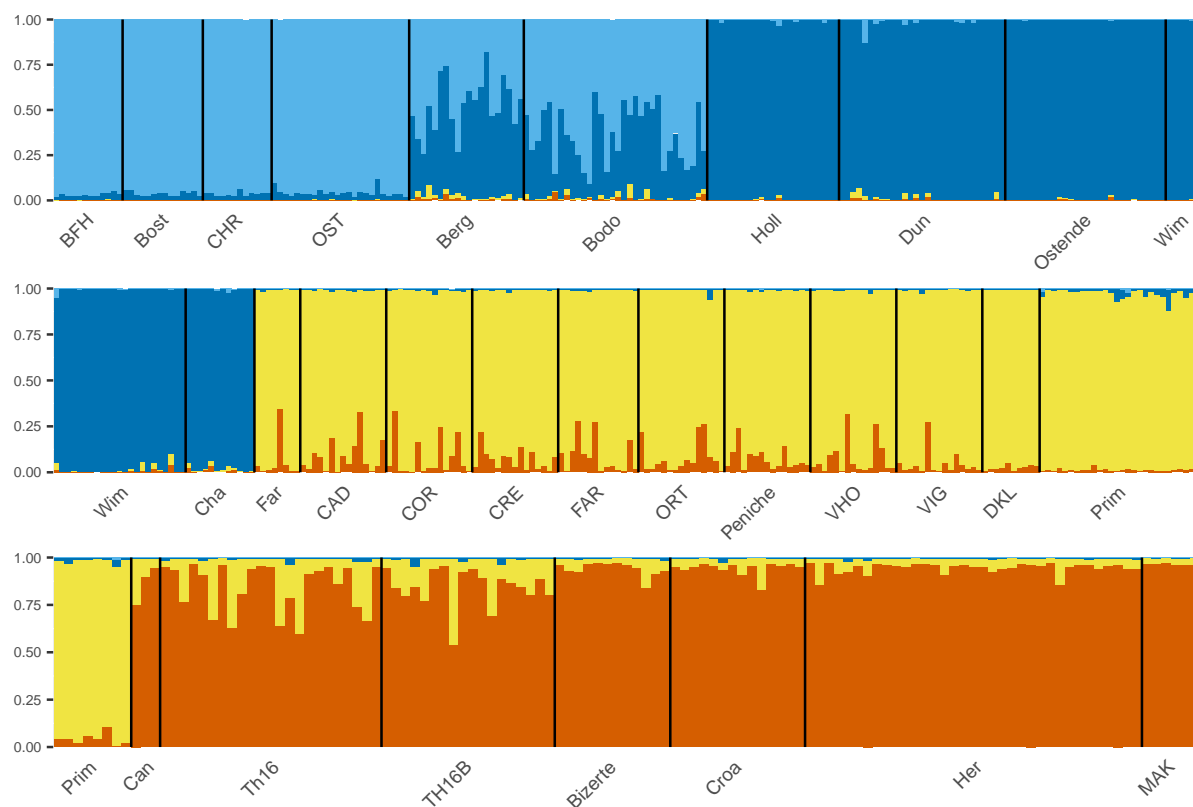

Figure S6: Structure results with all individuals excluding the ones with *M. trossulus* ancestry,  $K = 4$  major cluster. Subset corresponding to reference populations only including individuals from the reference groups (table S4) after filtration.

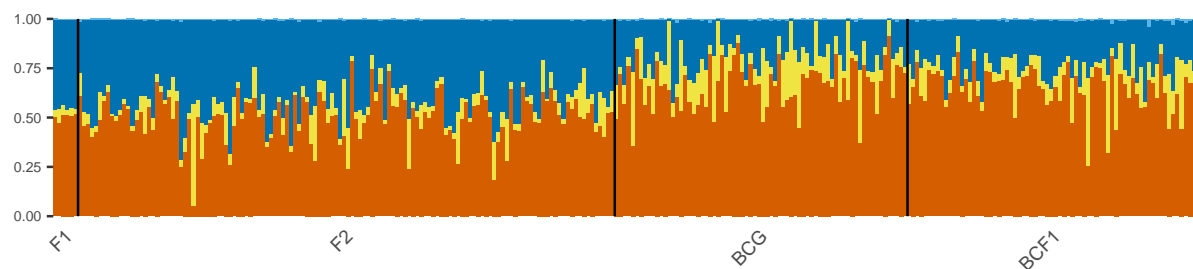

Figure S7: Subset of the lab crosses.

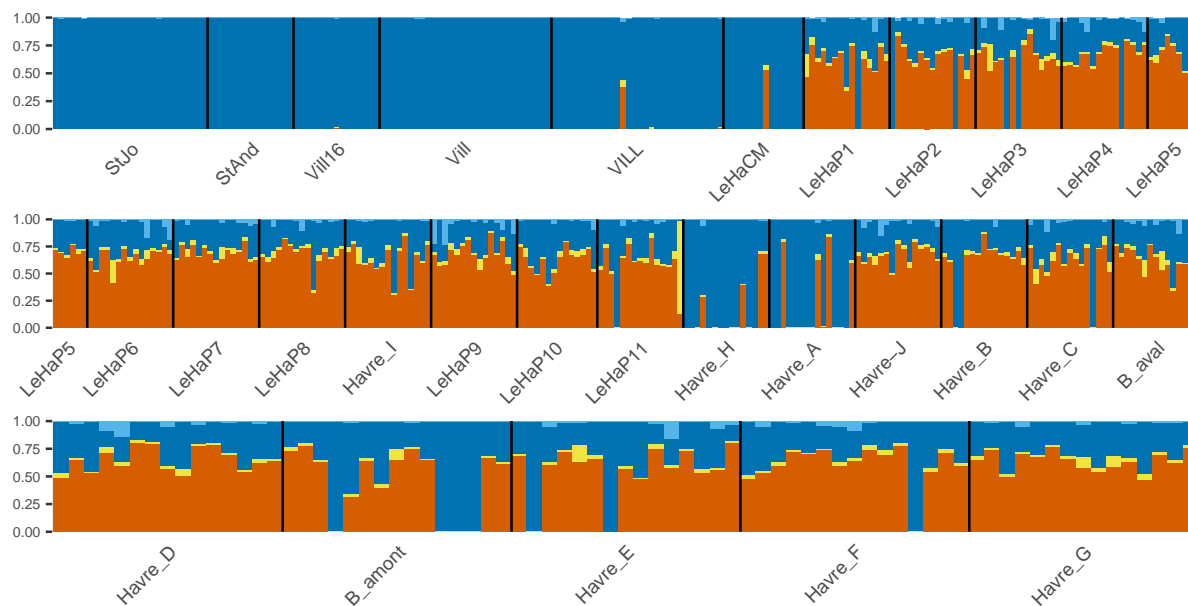

Figure S8: Subset of the port of Le Havre.

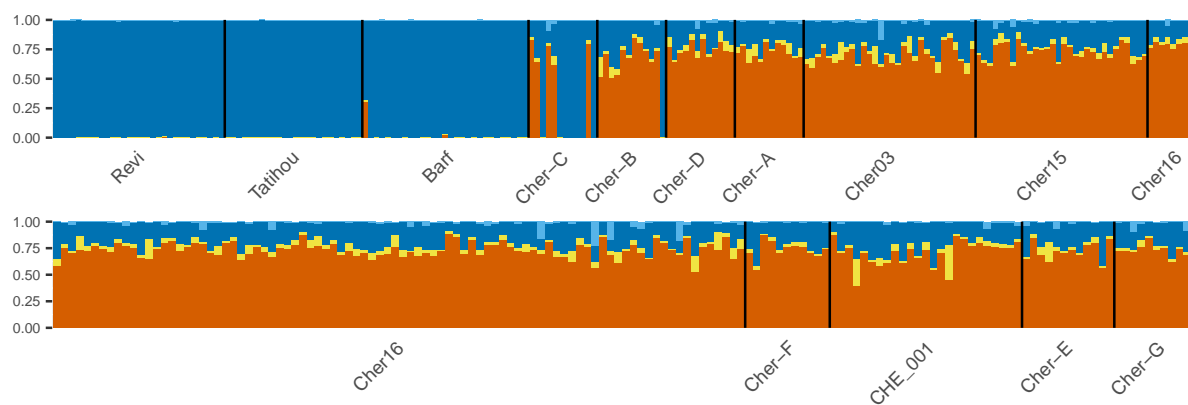

Figure S9: Subset of the port of Cherbourg.

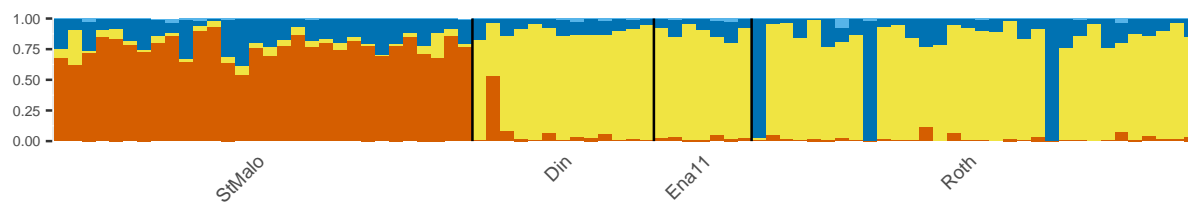

Figure S10: Subset of the port of Saint-Malo.

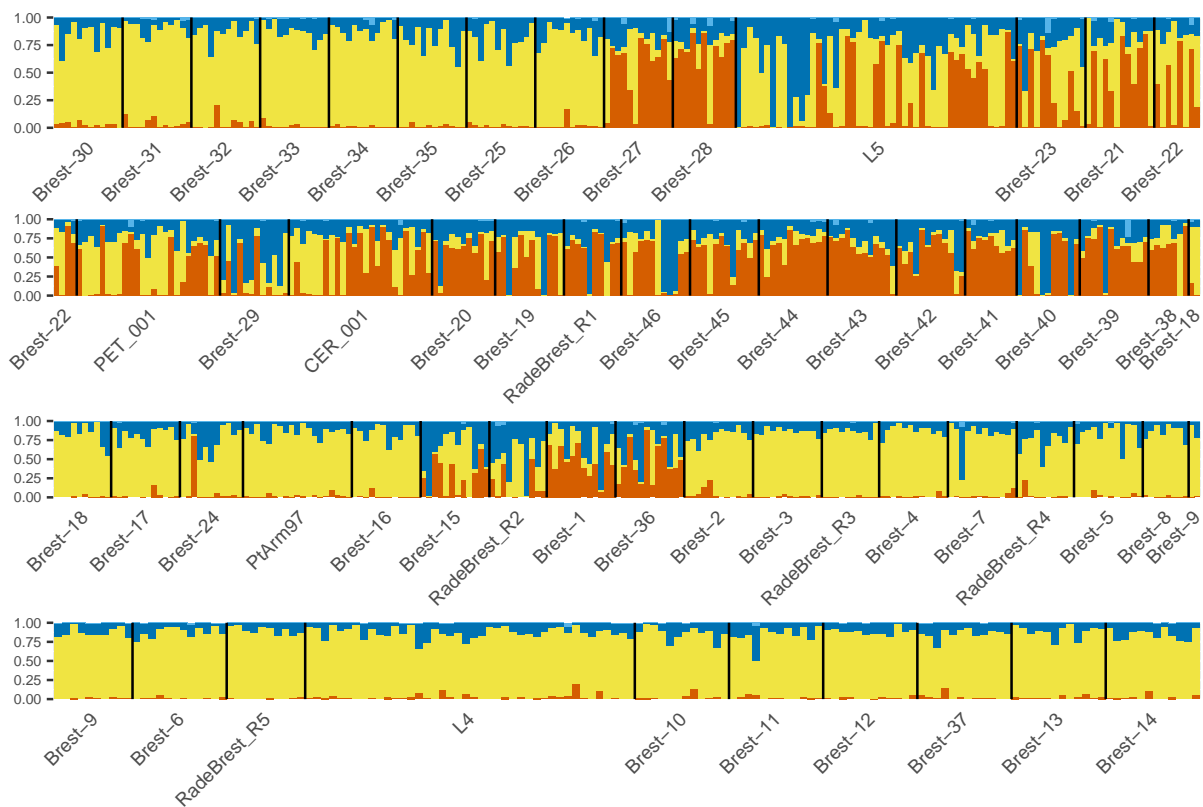

Figure S11: Subset of the Brest bay area.

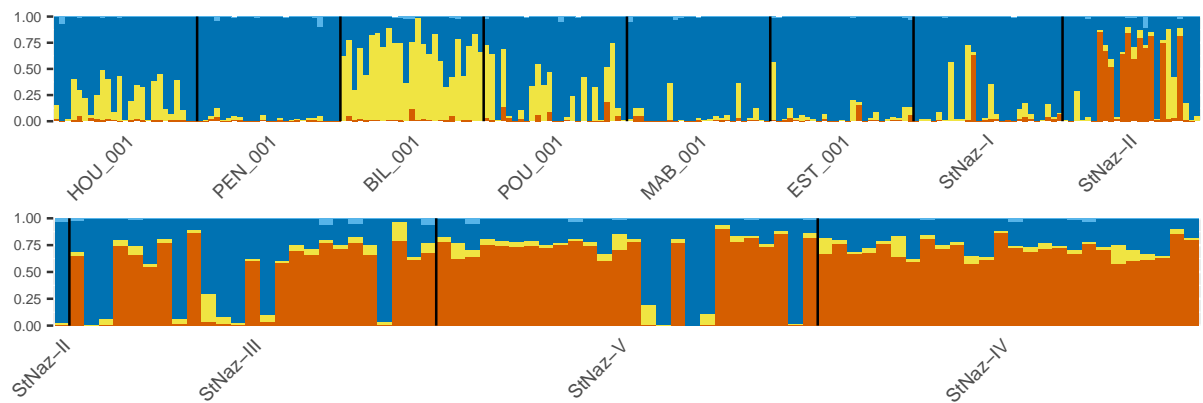

Figure S12: Subset of the port of Saint-Nazaire.

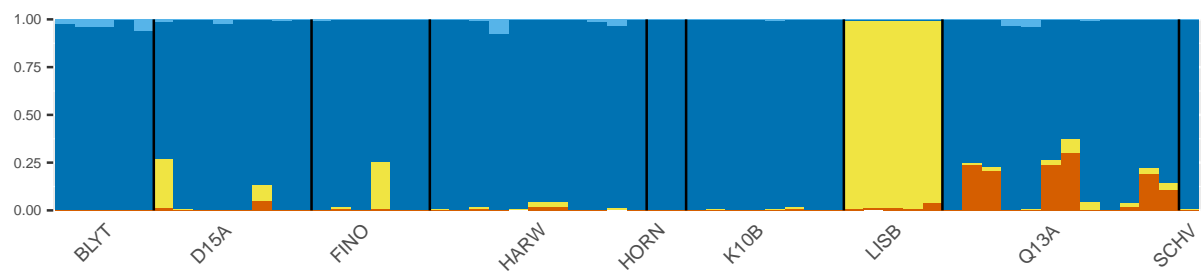

Figure S13: Subset of the populations studied in Coolen (2017).

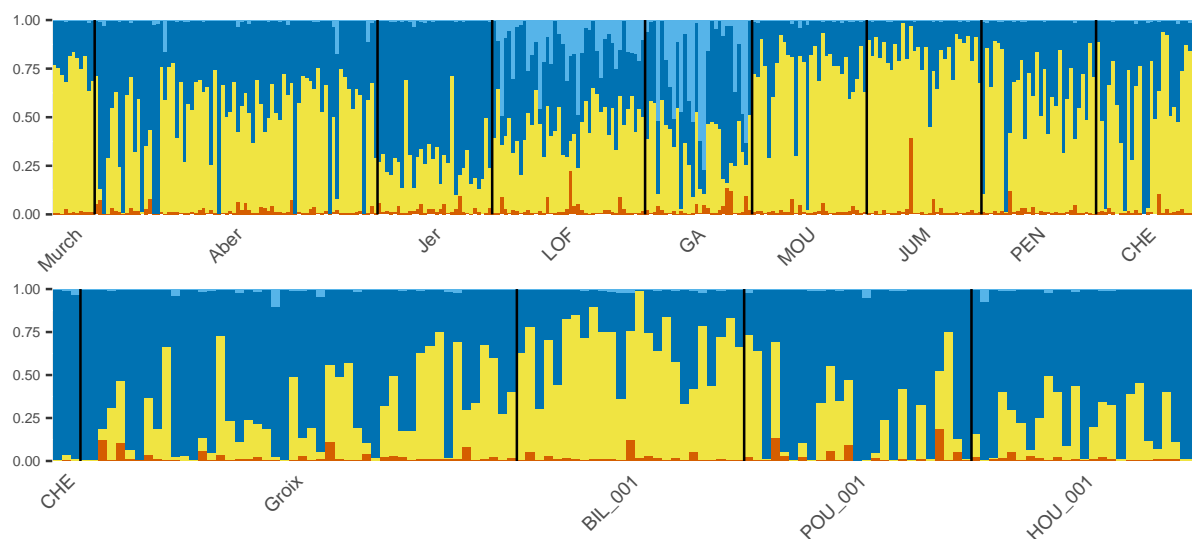

Figure S14: Subset of Atlantic *M. galloprovincialis* admixed.

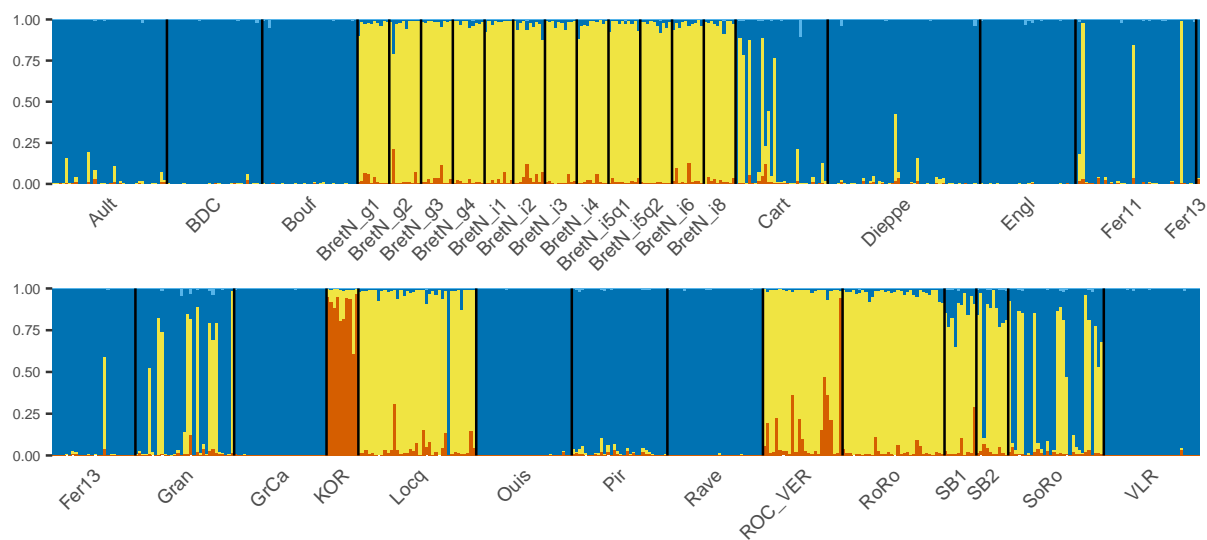

Figure S15: Subset for additional populations.

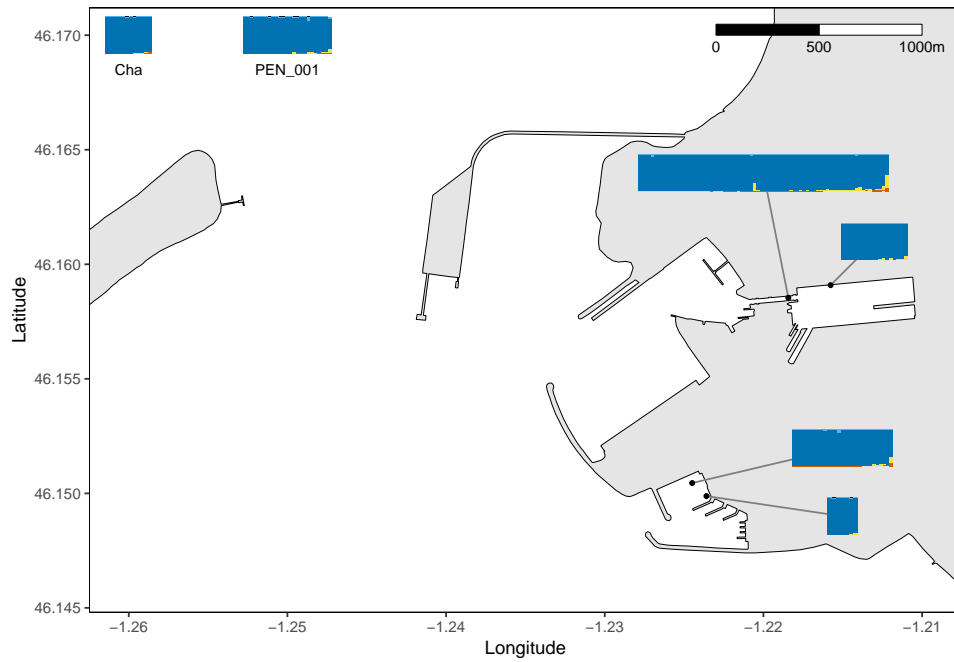

Figure S16: Map of the port of La Rochelle, bay of Biscay, France. Barplots represent individual ancestry proportions for each site. Barplots at the map edges correspond to distant populations. No Mediterranean *M. galloprovincialis* ancestry is detected in this port.

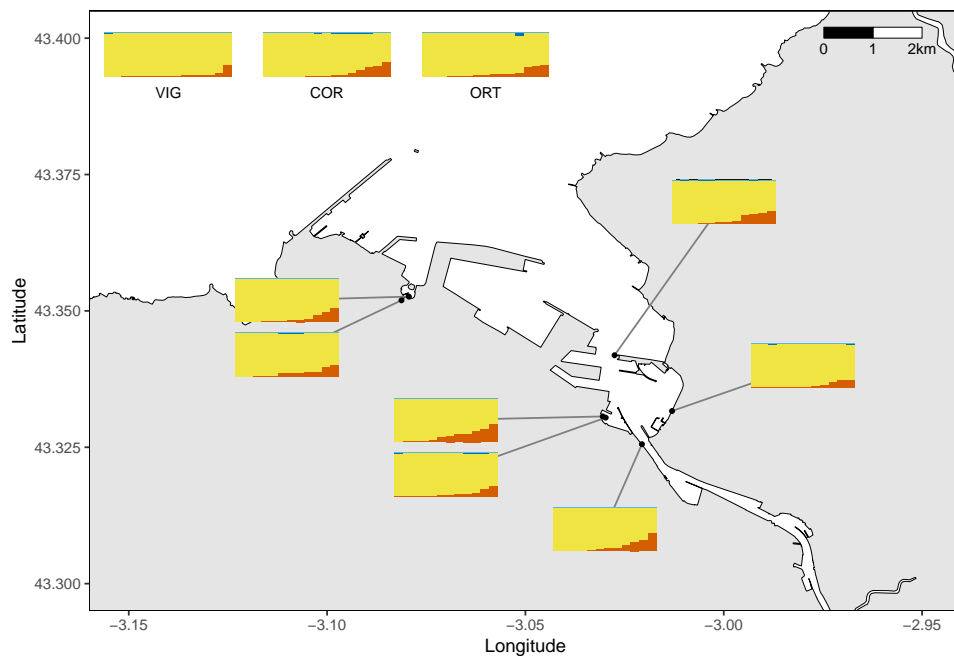

Figure S17: Map of the port of Bilbao, Basque Country, Spain. Sites inside the port do not exhibit different ancestry compositions than more distant populations



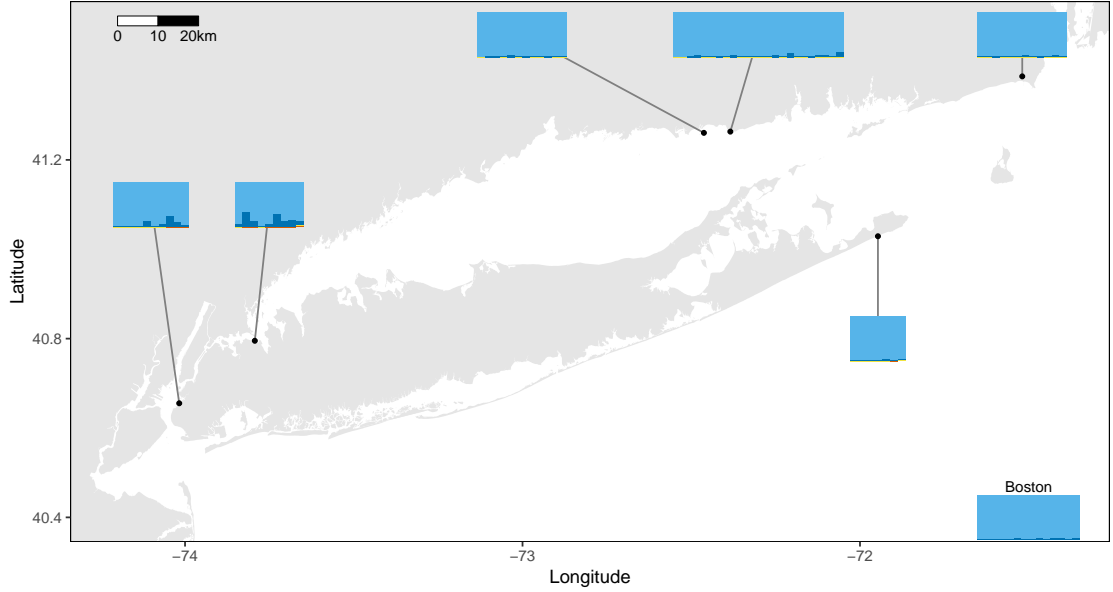

Figure S18: Map of the Long Island Sound, NY, USA. The two leftmost populations exhibit more European *M. edulis* ancestry than local American *M. edulis* populations.

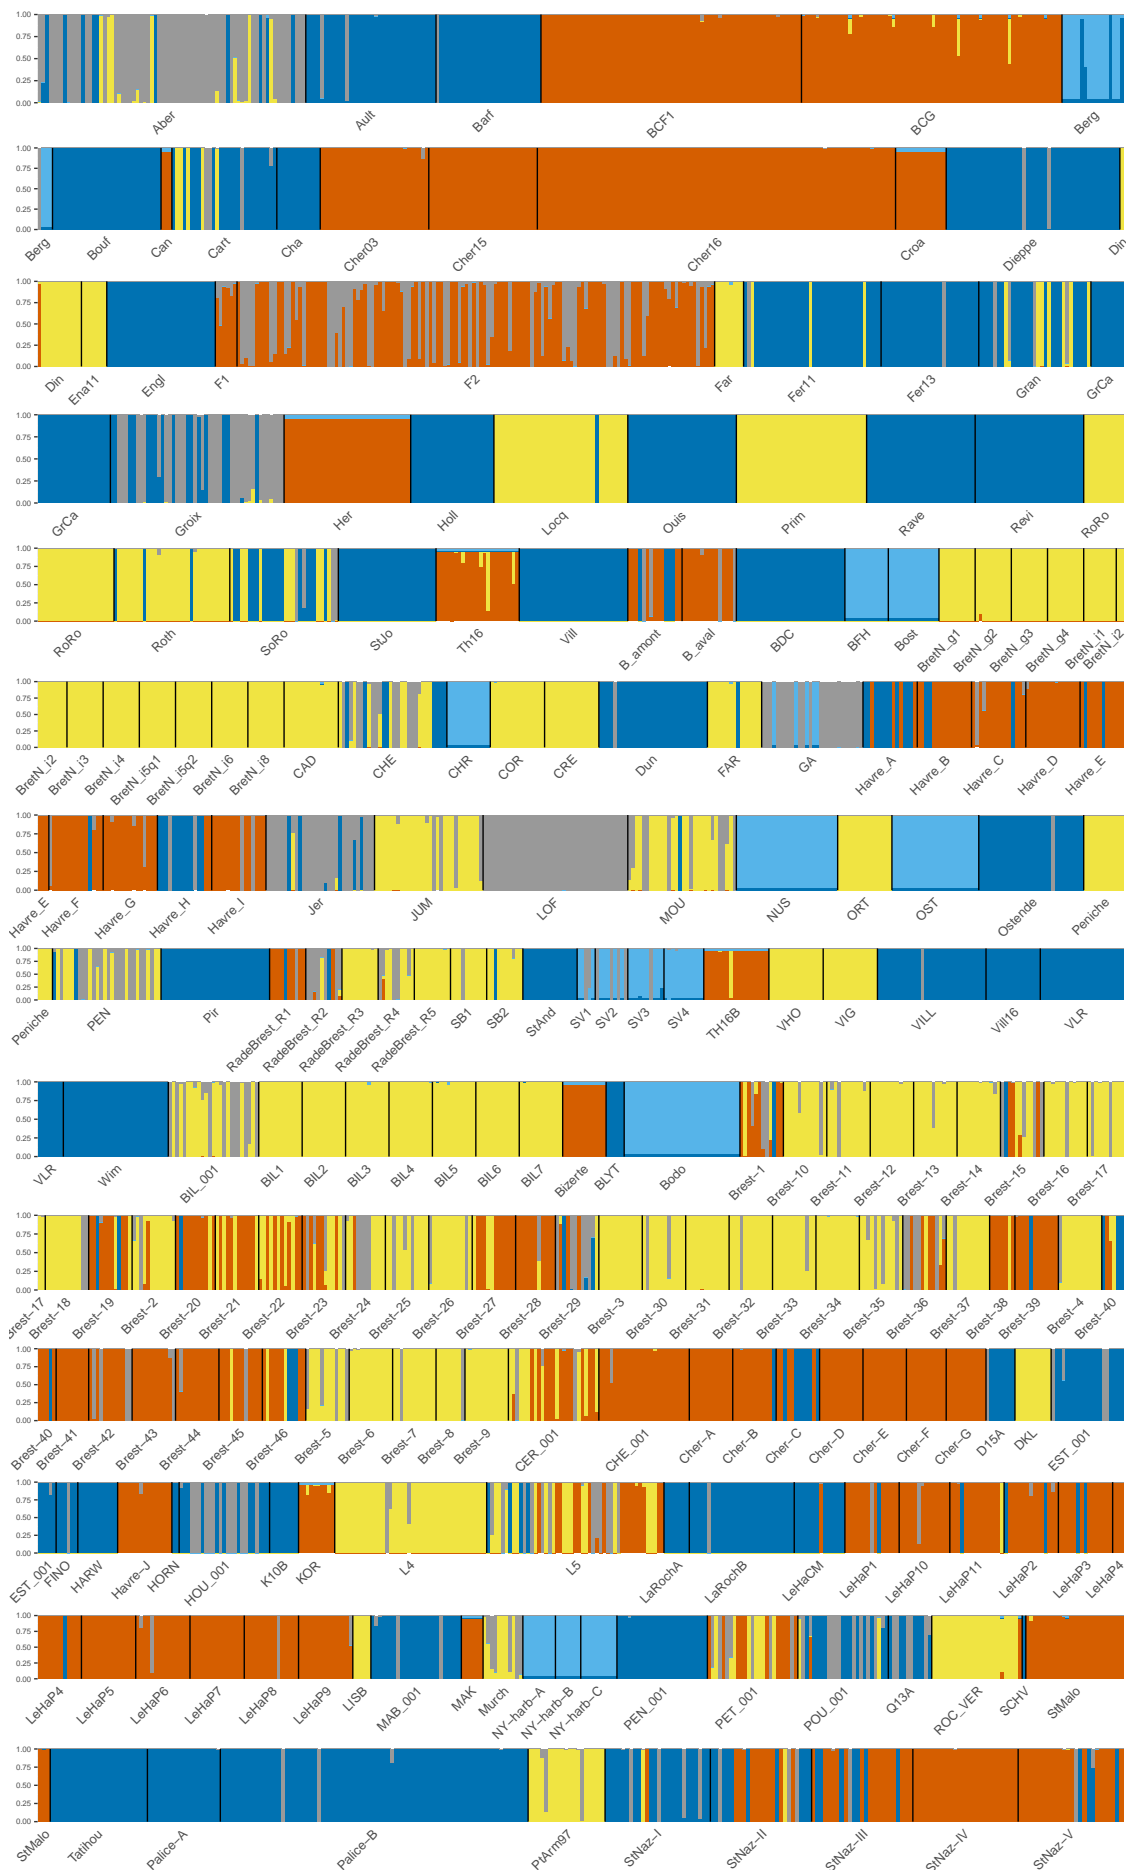

Figure S19: Structure without admixture model,  $K = 5$

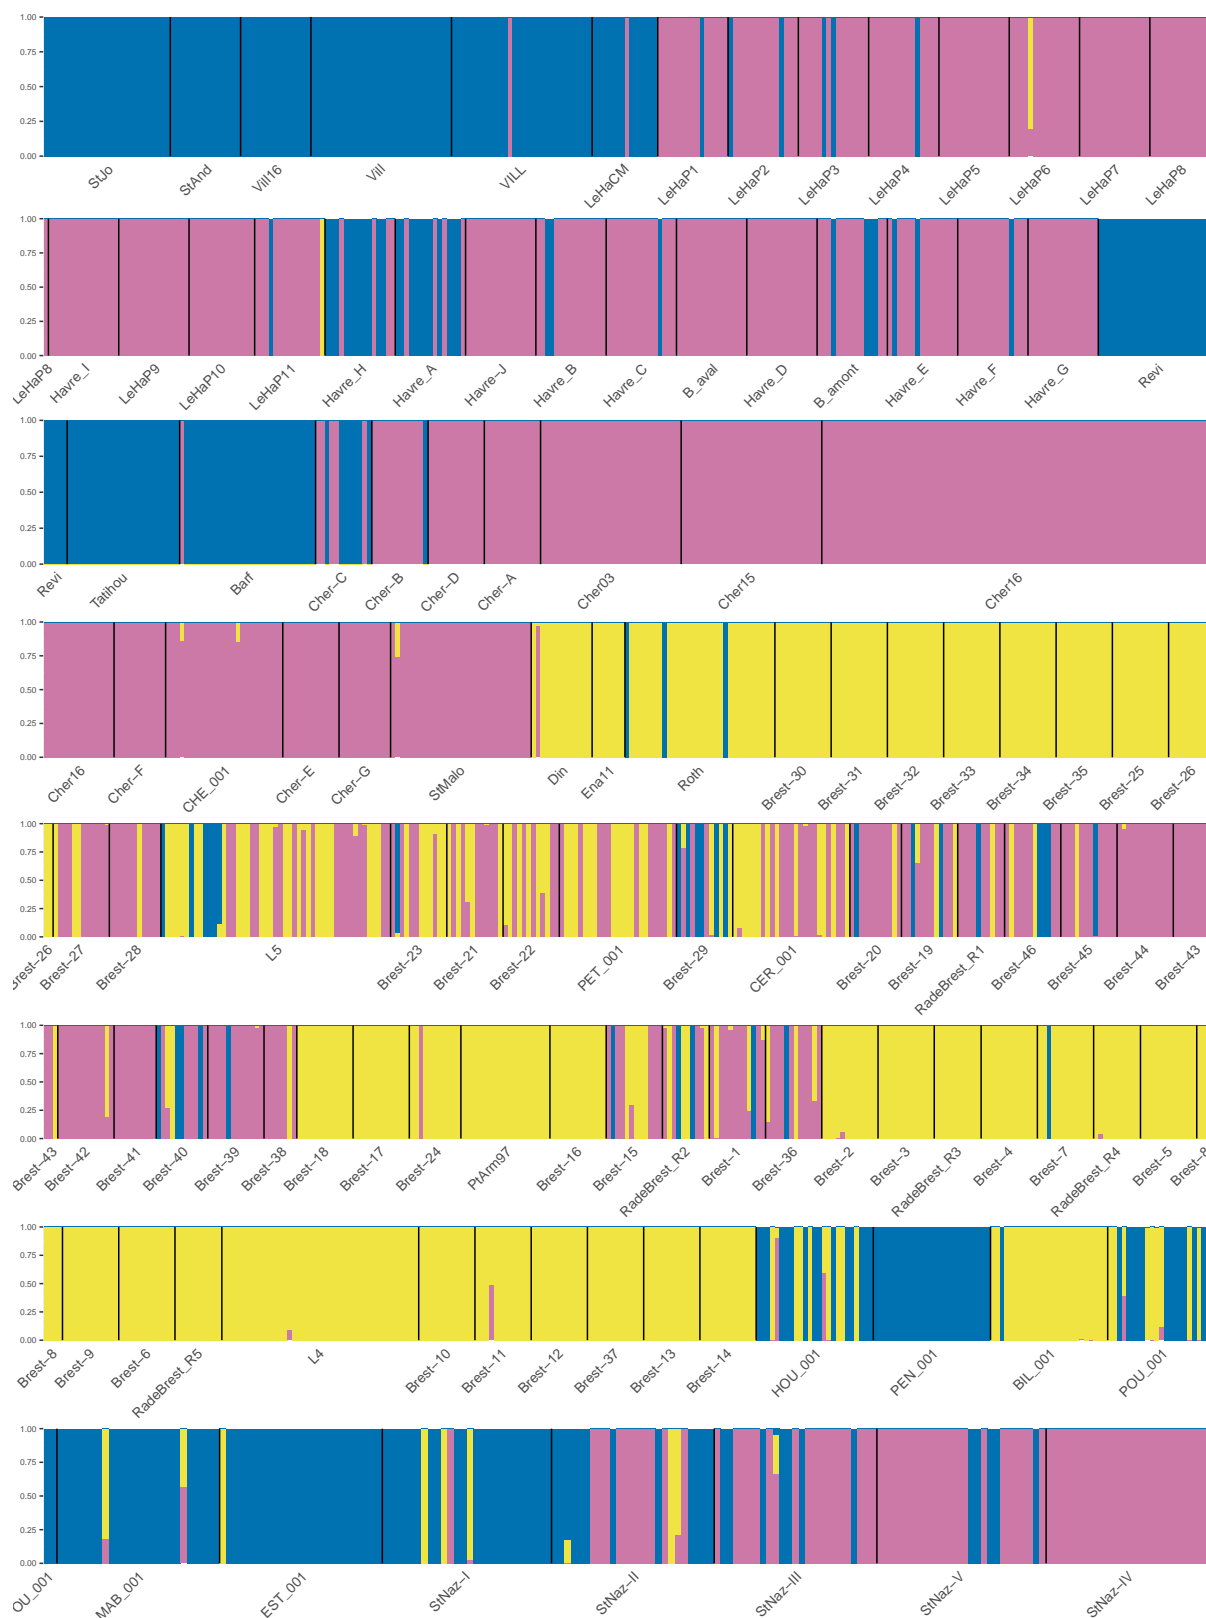

Figure S20: Structure without admixture model only with port and local populations,  $K = 3$

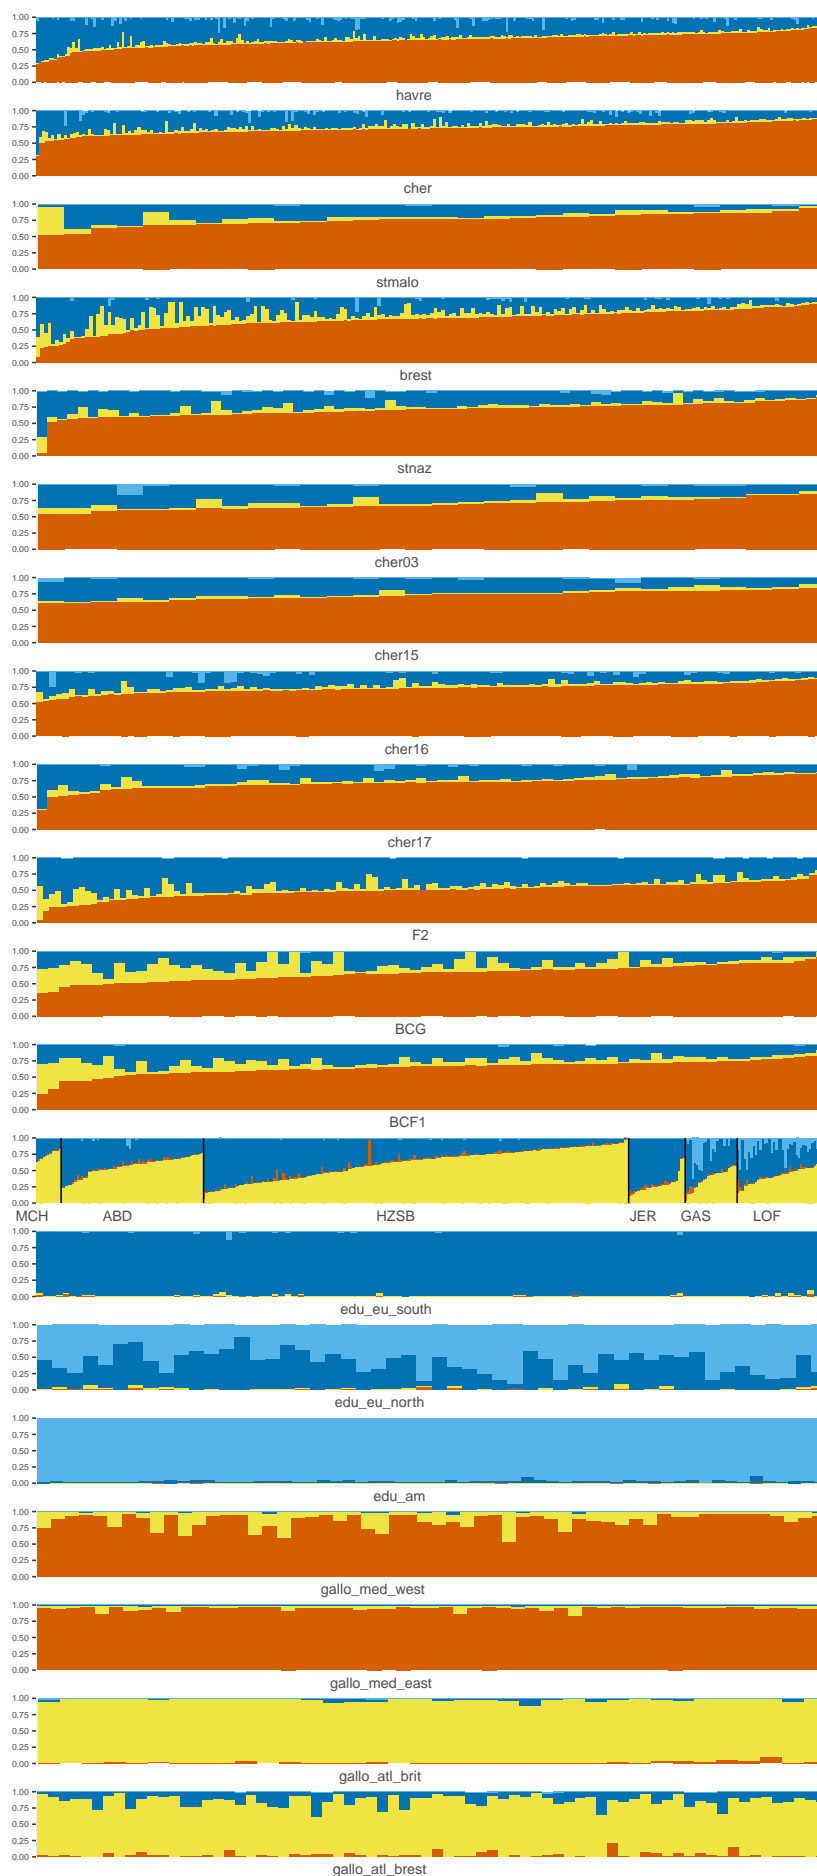

Figure S21: Structure plot of selected individuals for each group for downstream analyses

## 2.3 Ancestry comparisons

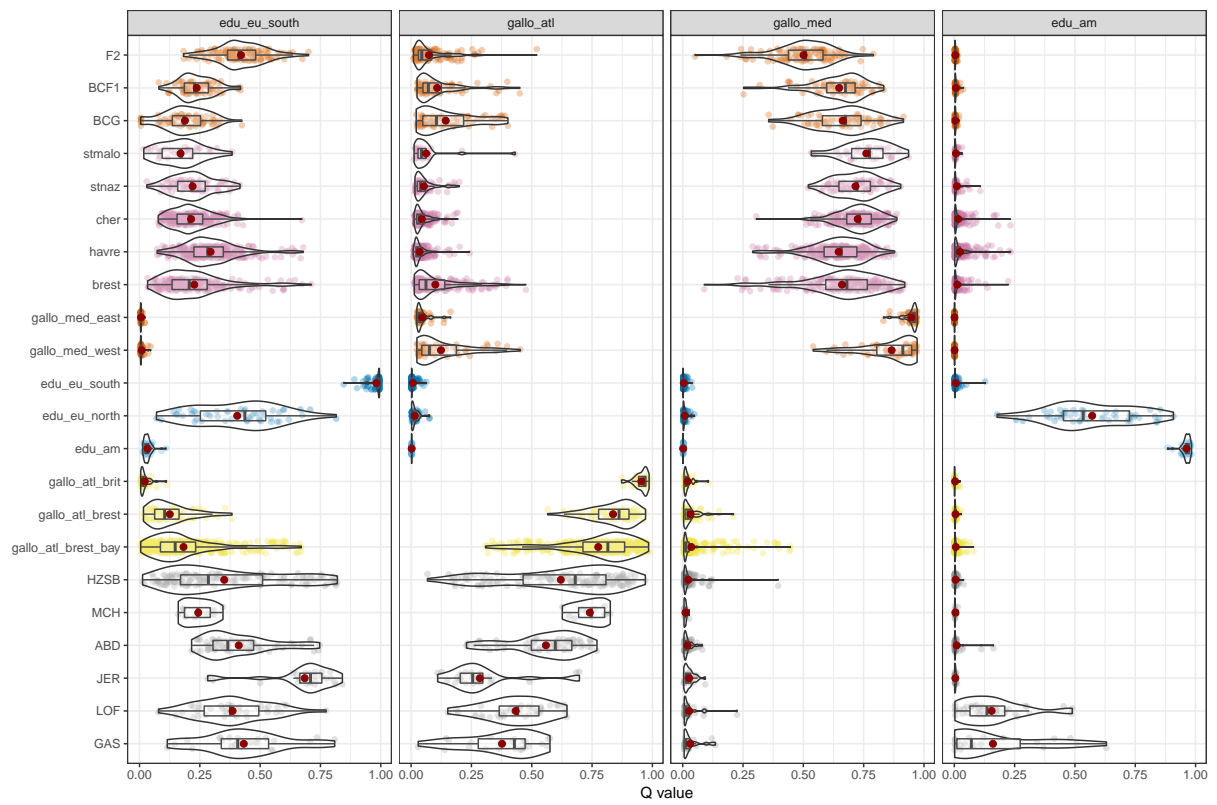

Figure S22: Ancestry levels in each population of admixed mussels and reference groups.

## 2.4 Linkage disequilibrium

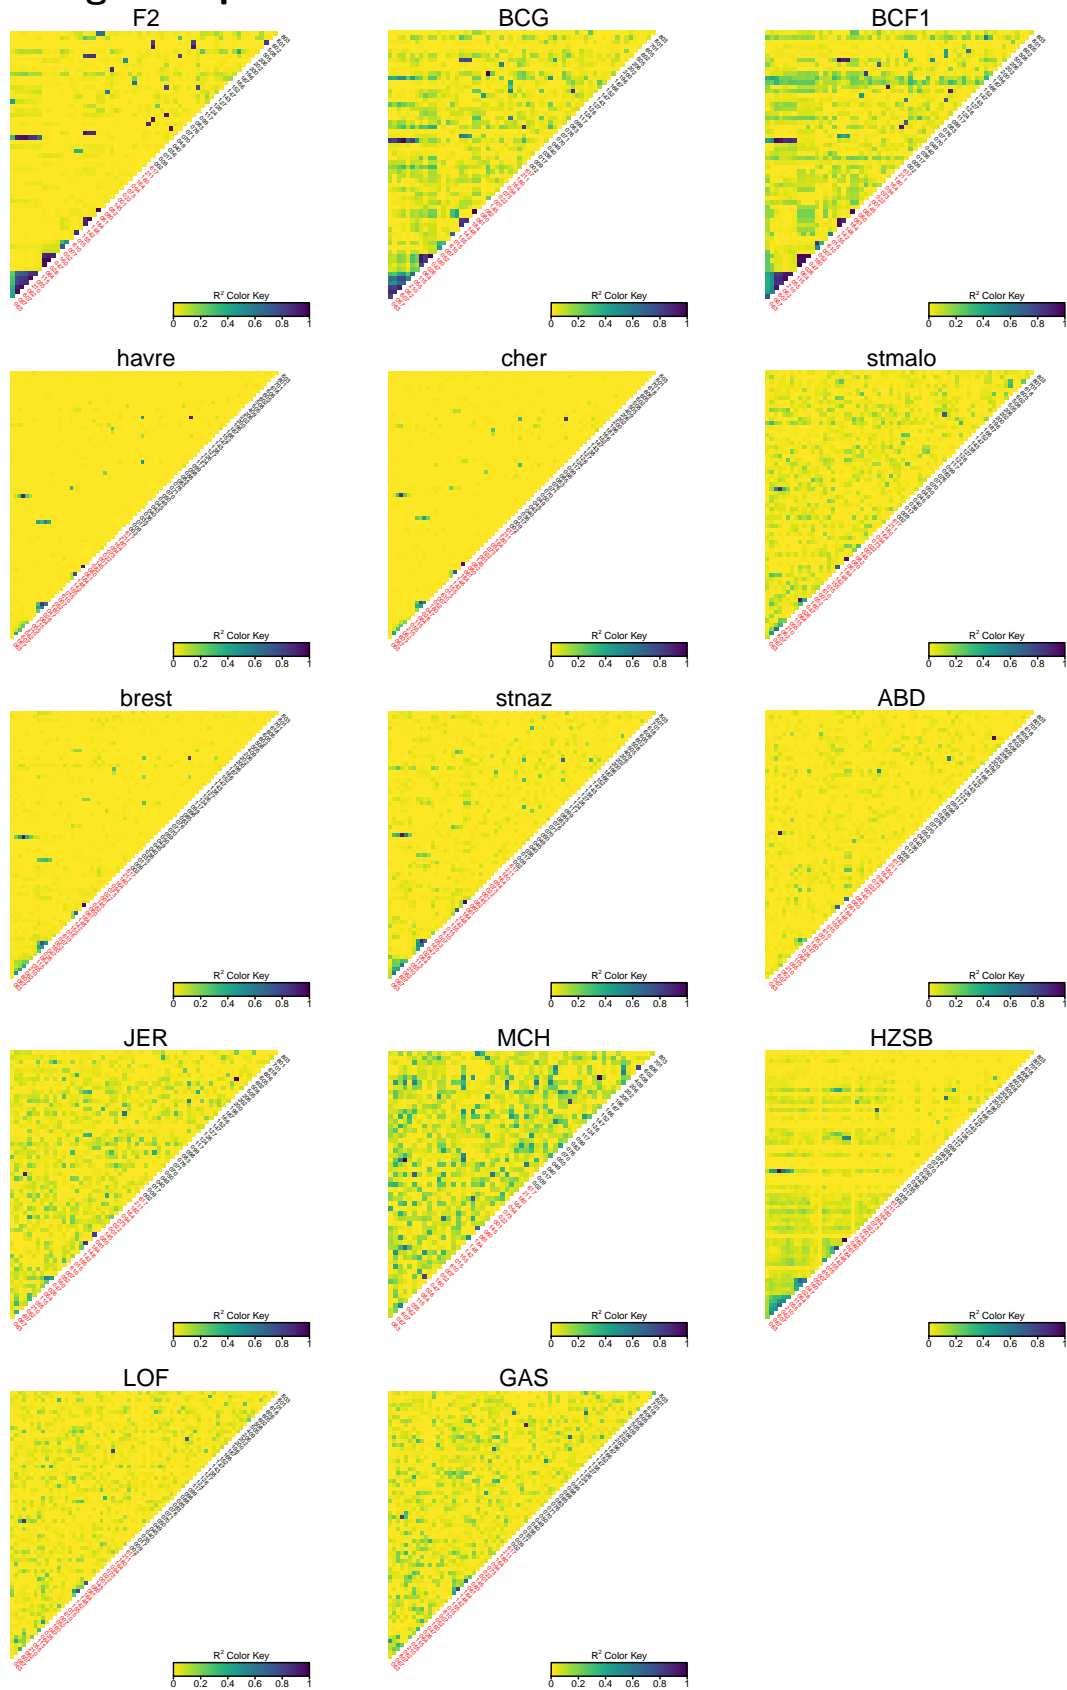

Figure S23: Linkage disequilibrium ( $R^2$ ) in admixed populations. Markers are order following the genetic map (red labels) and then by name for loci that could be included in the genetic map construction.

## 2.5 Newhybrids analyses

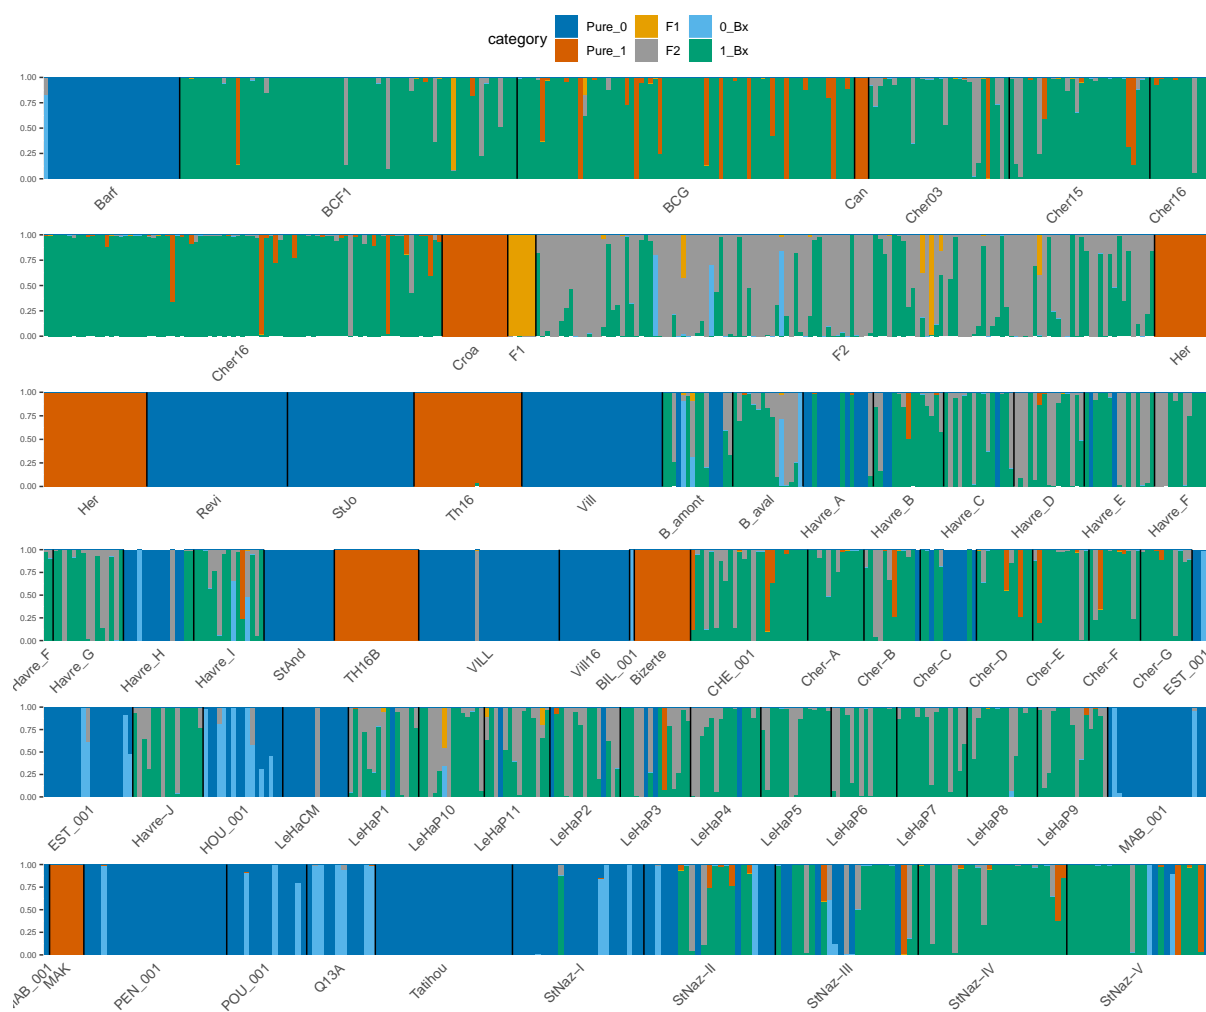

Figure S24: Newhybrids analysis including reference Mediterranean *M. galloprovincialis* and local populations of all ports excluding Brest.

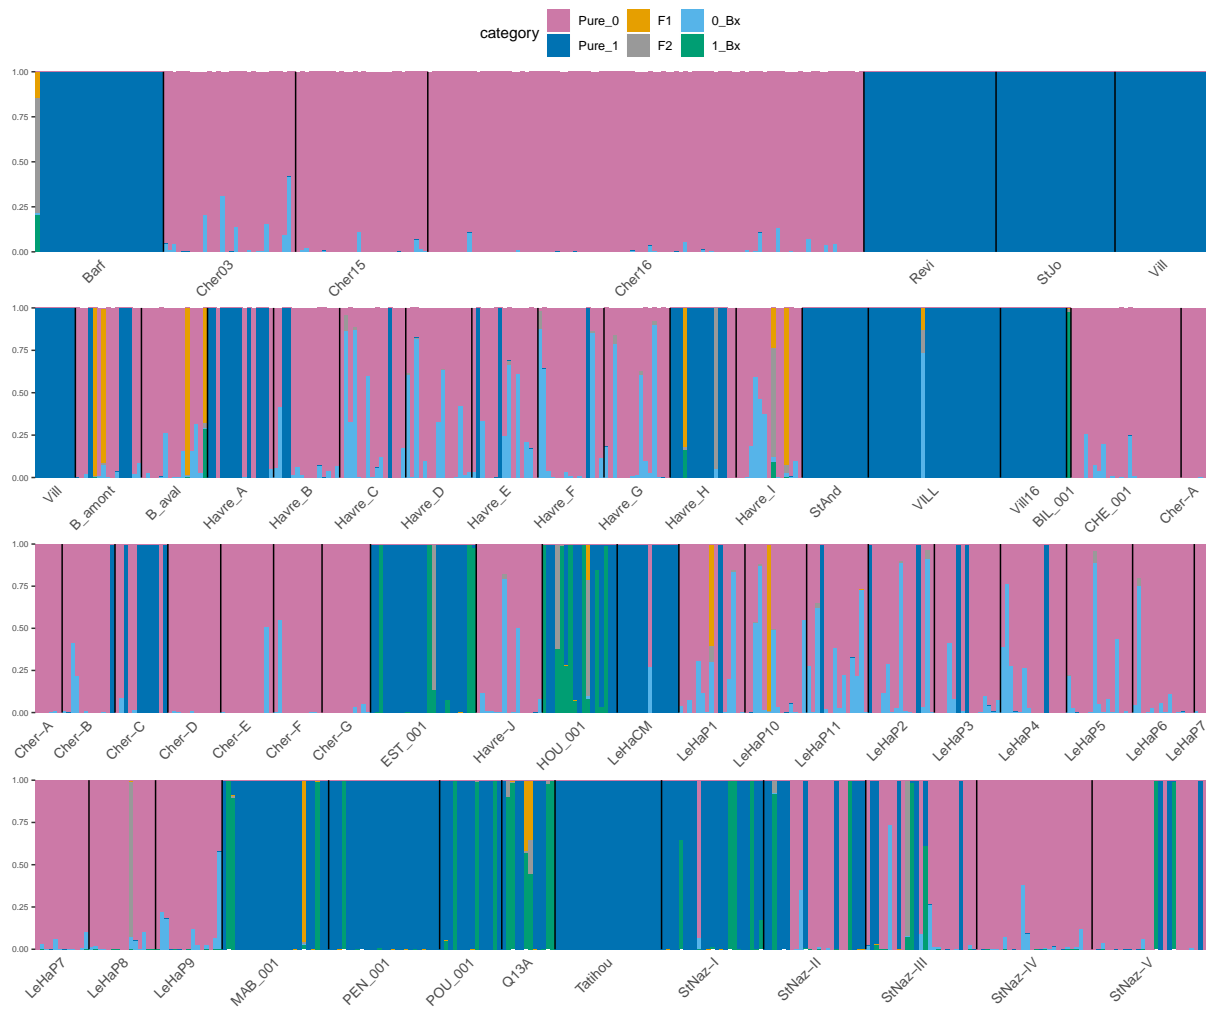

Figure S25: Newhybrids analysis comparing dock with the two parentals being dock mussels and *M. edulis*.



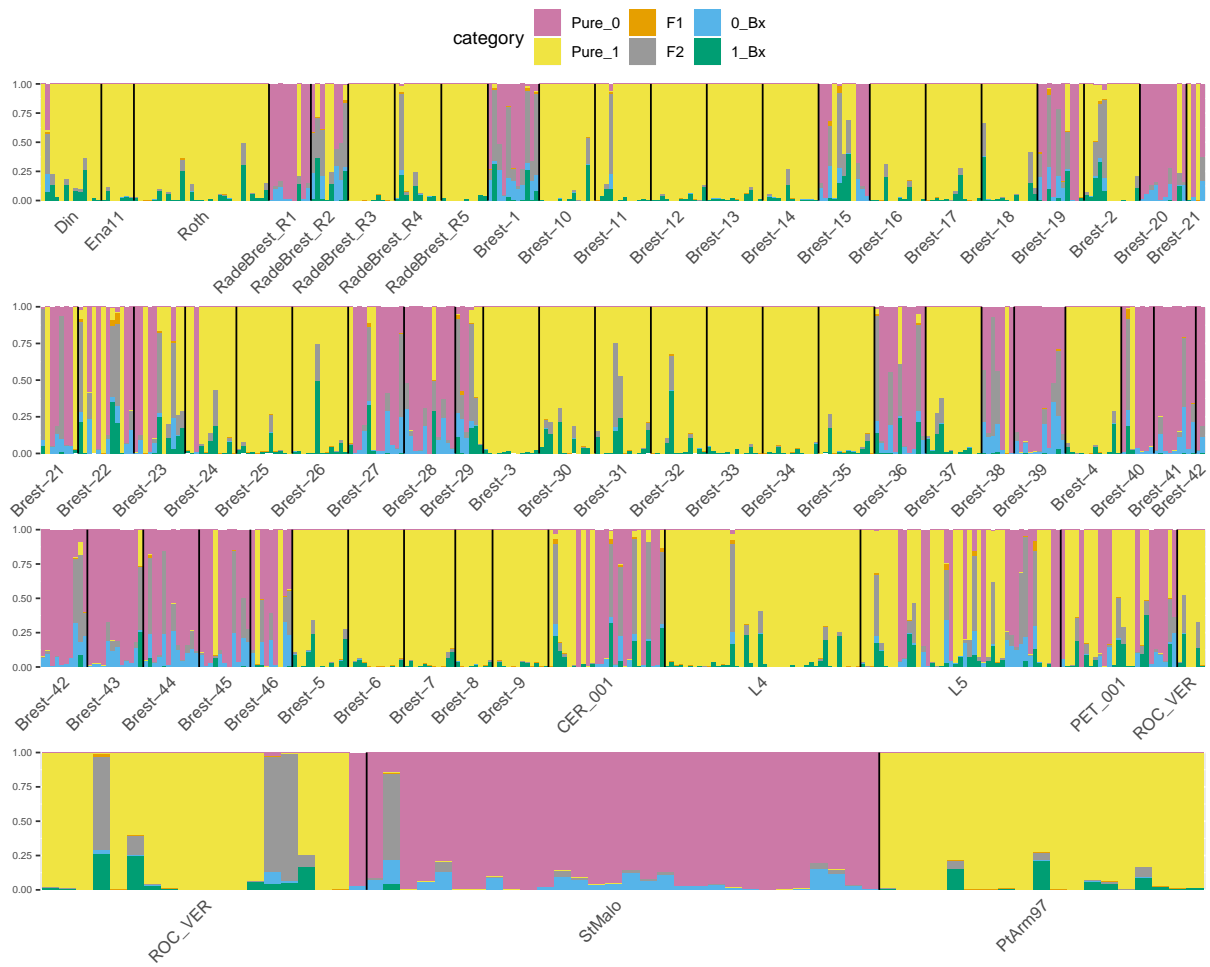

Figure S26: Newhybrids analysis comparing dock with the two parentals being dock mussels and Atlantic *M. galloprovincialis*.

## 2.6 Geographic clines per locus

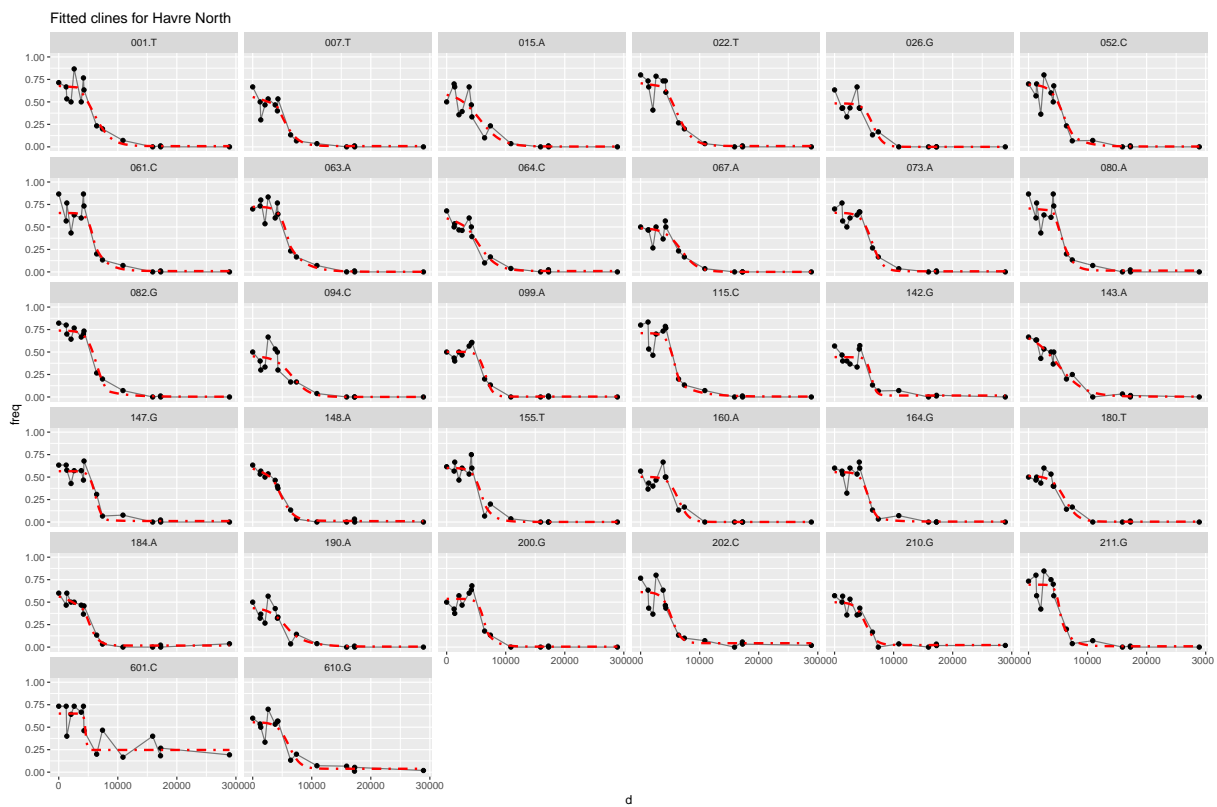

Figure S27: Details of geographic clines per marker fitted in Le Havre North transect. Each point is the allele frequency of the Med. *M. galloprovincialis* allele at one site.

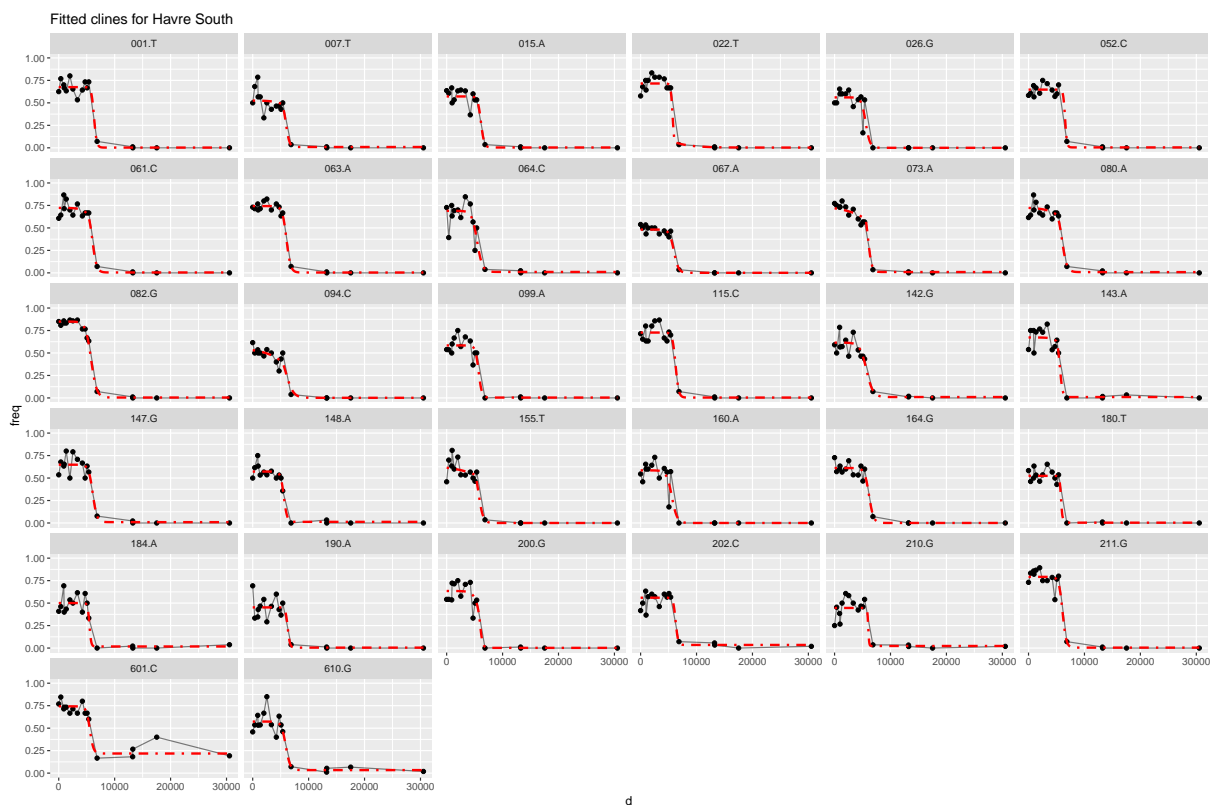

Figure S28: Details of geographic clines per marker fitted in Le Havre South transect.

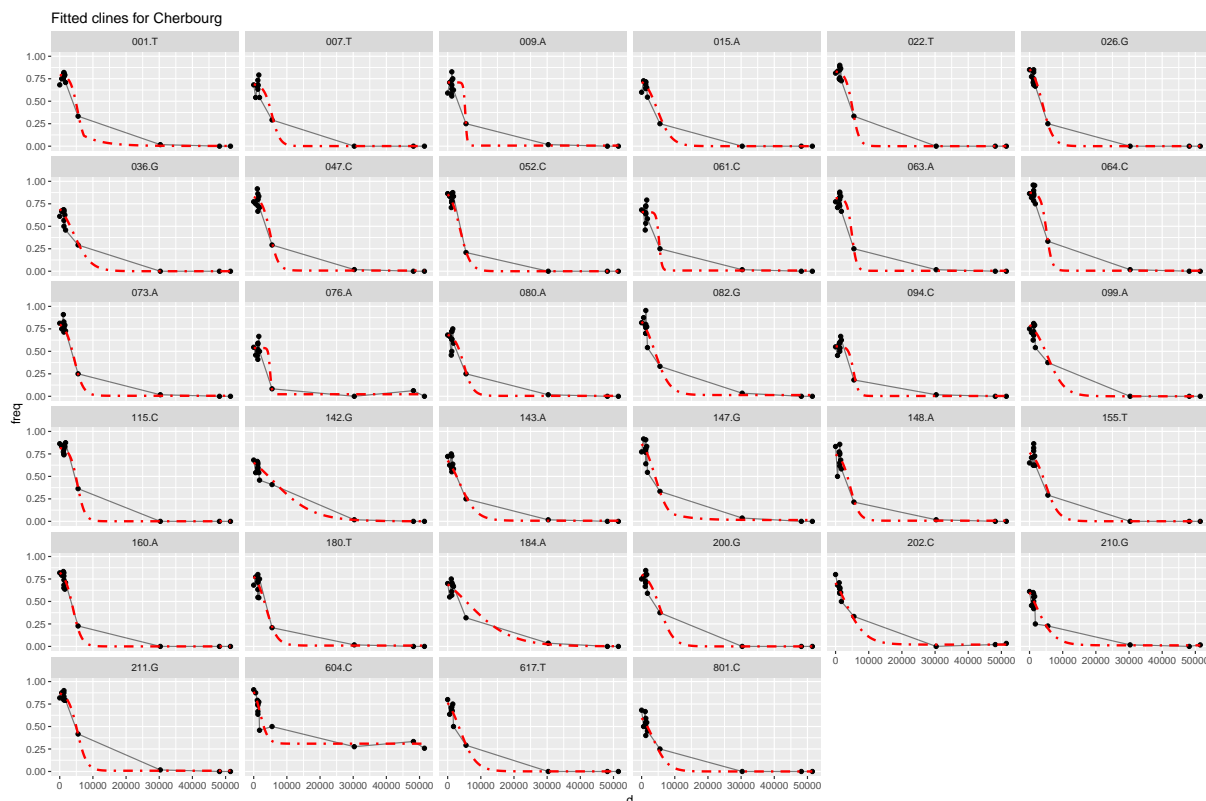

Figure S29: Details of geographic clines per marker fitted in Cherbourg.

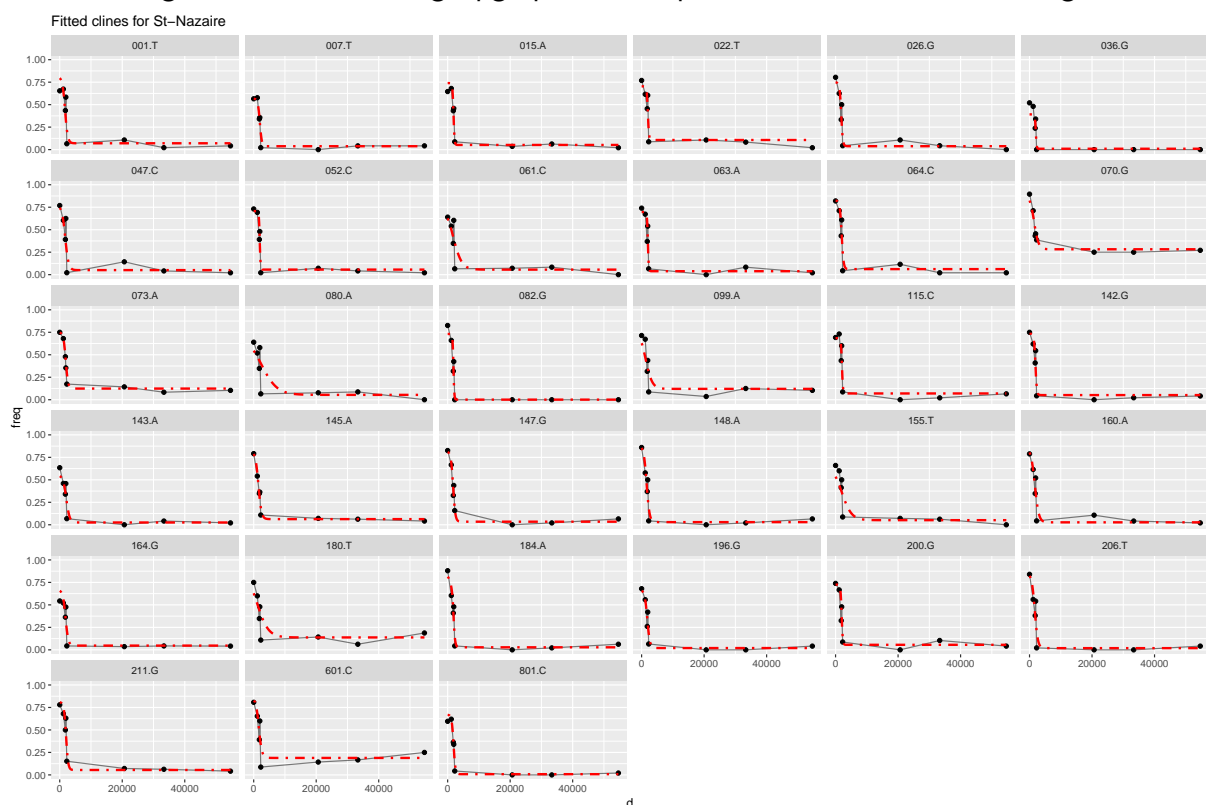

Figure S30: Details of geographic clines per marker fitted in Saint-Nazaire.

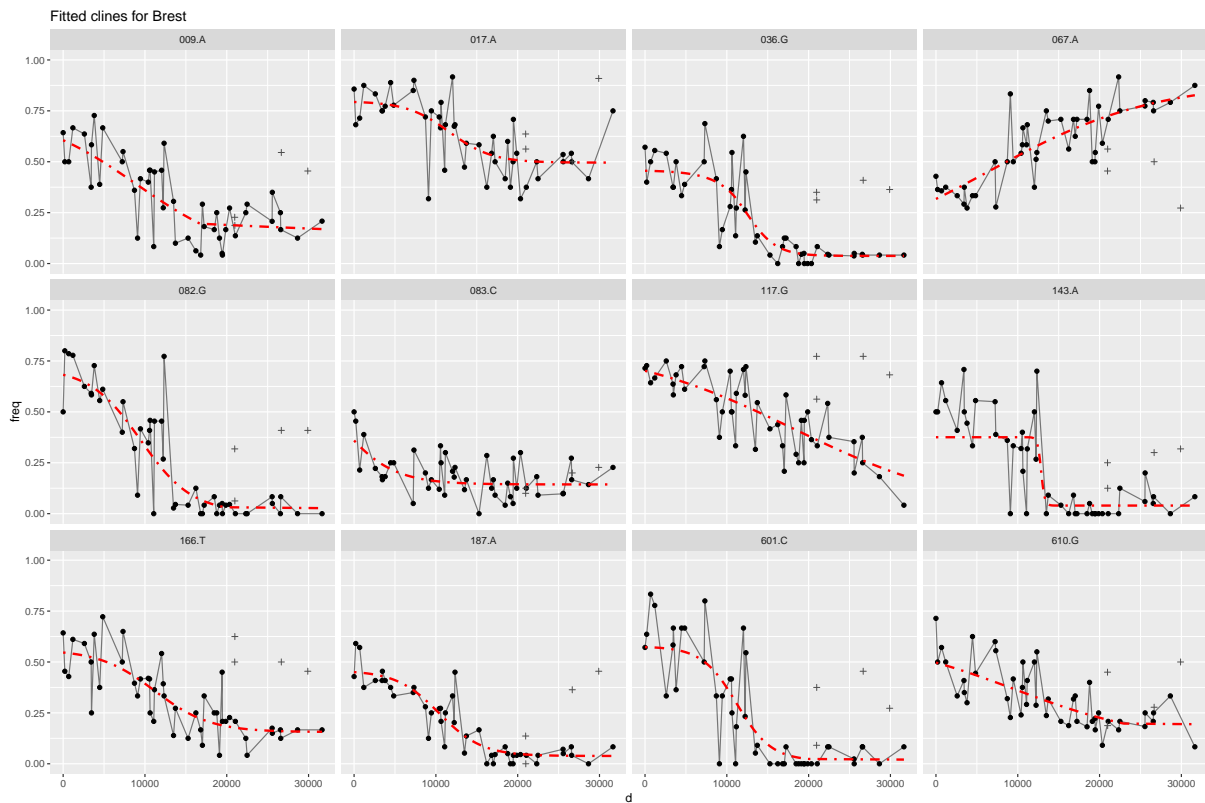

Figure S31: Details of geographic clines per marker fitted in the roadstead of Brest. Crosses are sites not considered for the fit.

## 2.7 Correlation of distortions

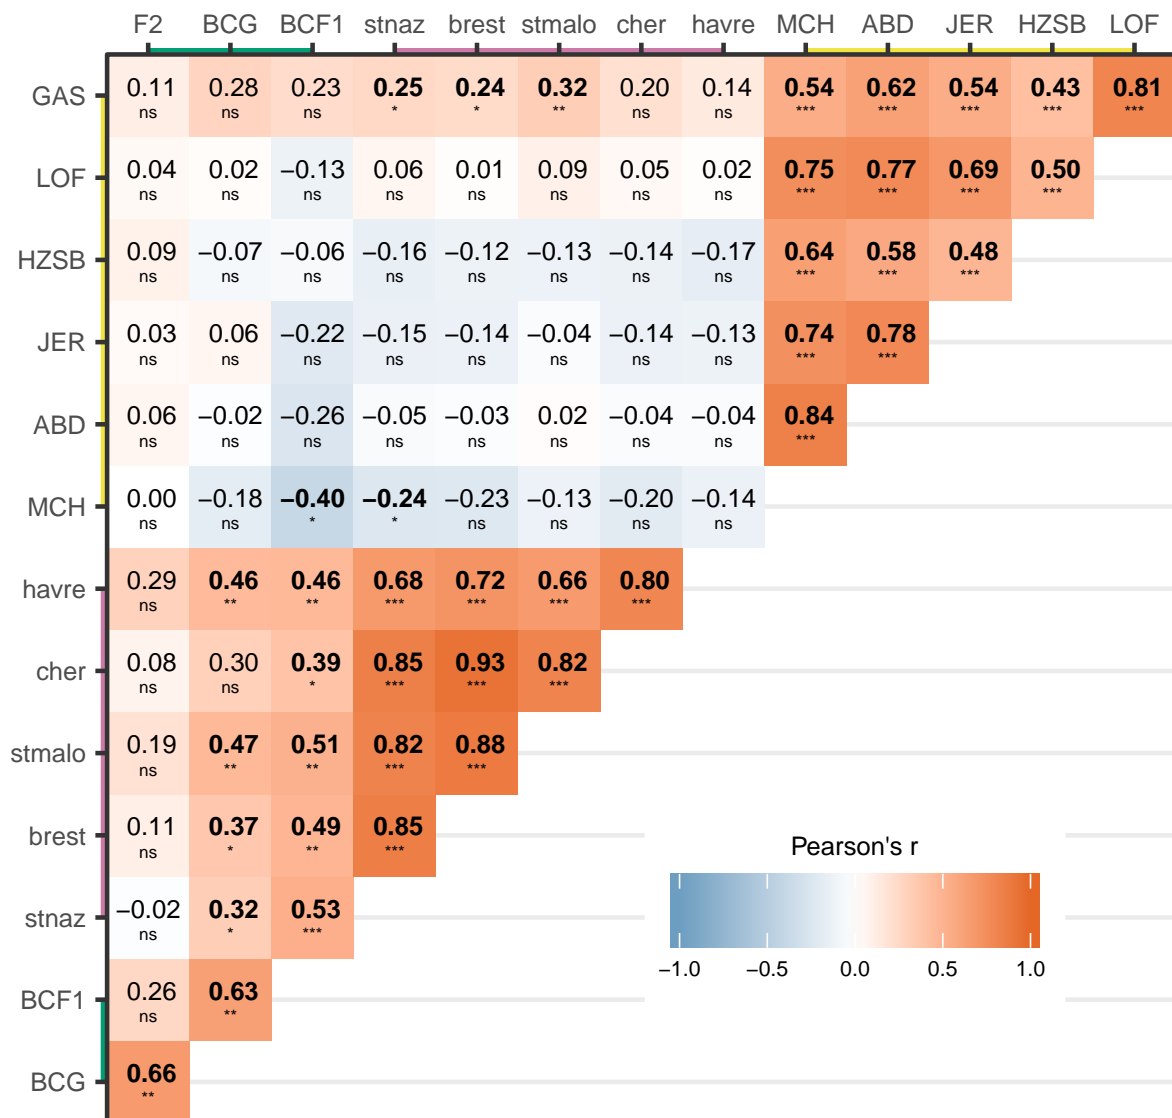

Figure S32: All correlations between populations.

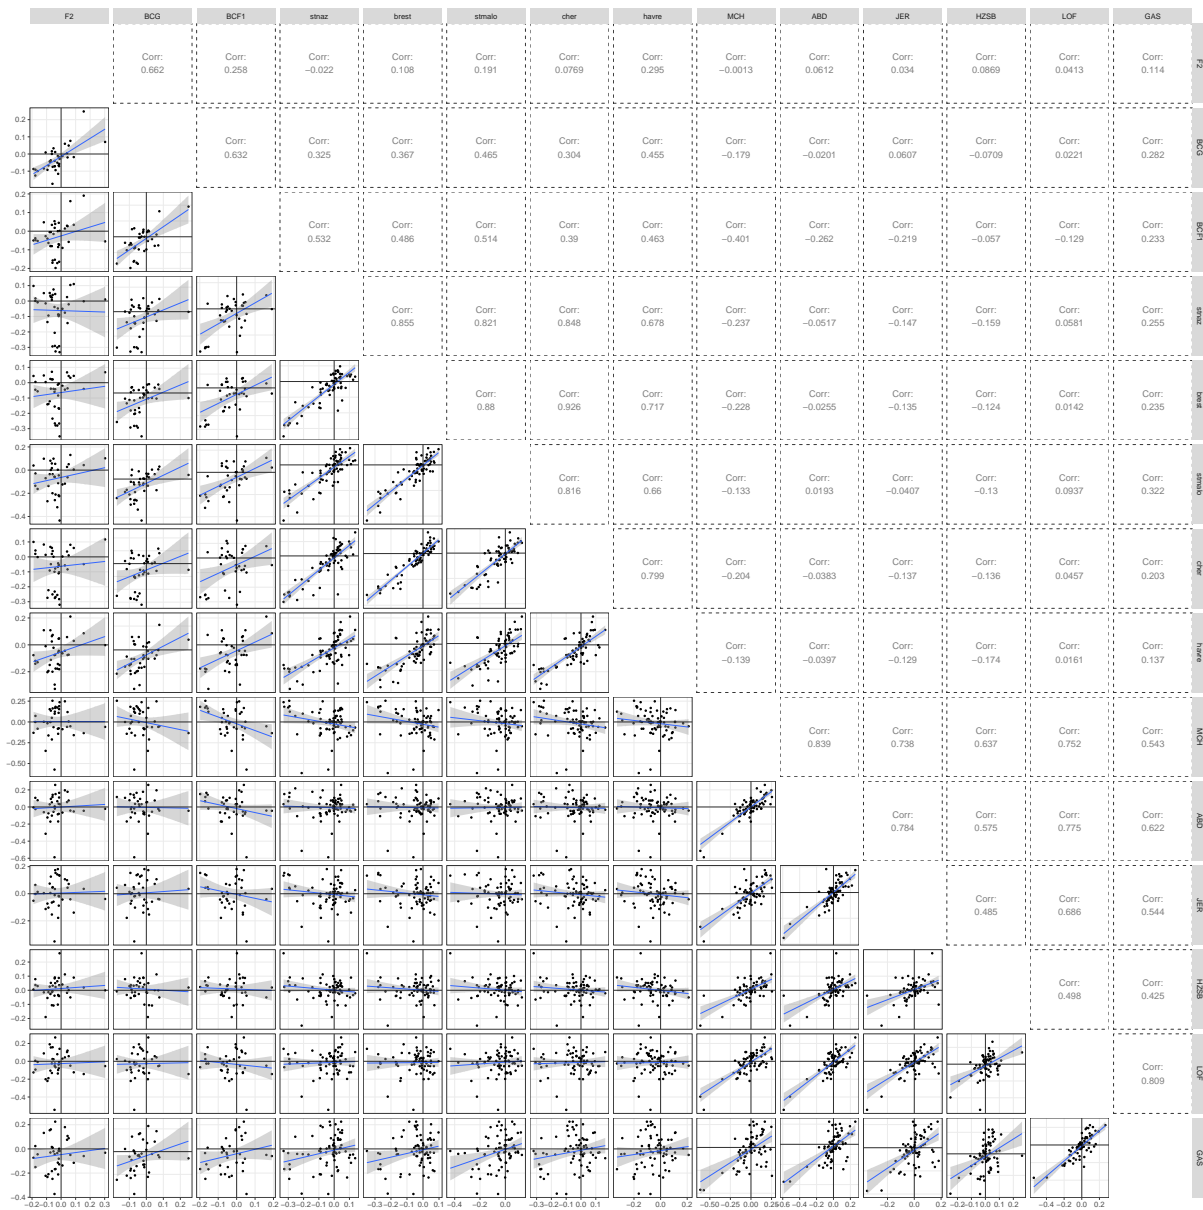

Figure S33: Scatter plots for all correlations between populations.

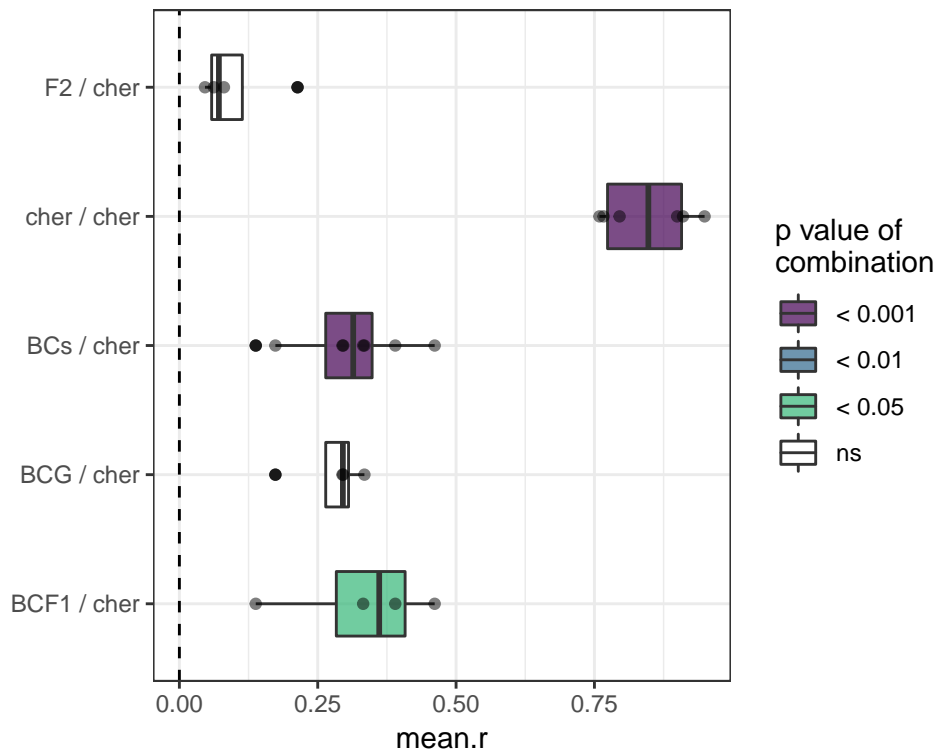

Figure S34: Correlation matrix for temporal variation in Cherbourg HWE dataset

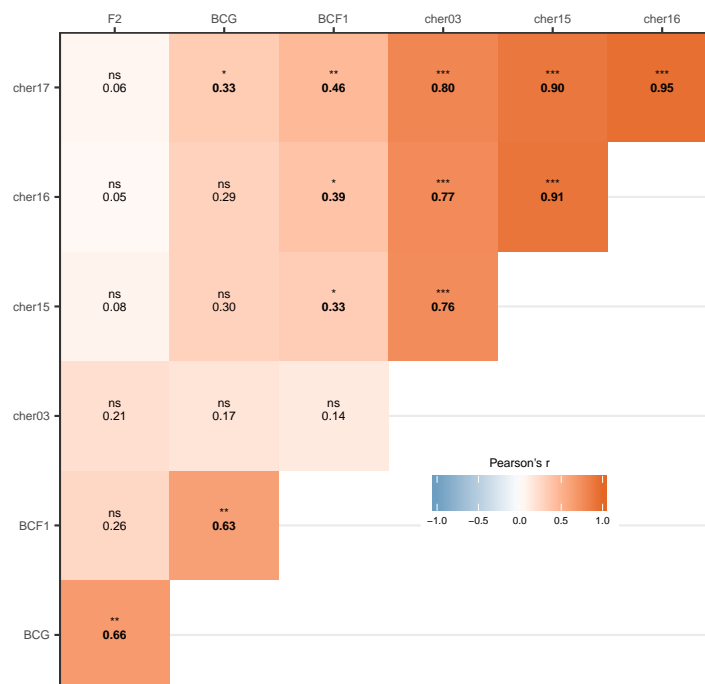

Figure S35: Correlation matrix for temporal variation in Cherbourg HWE dataset

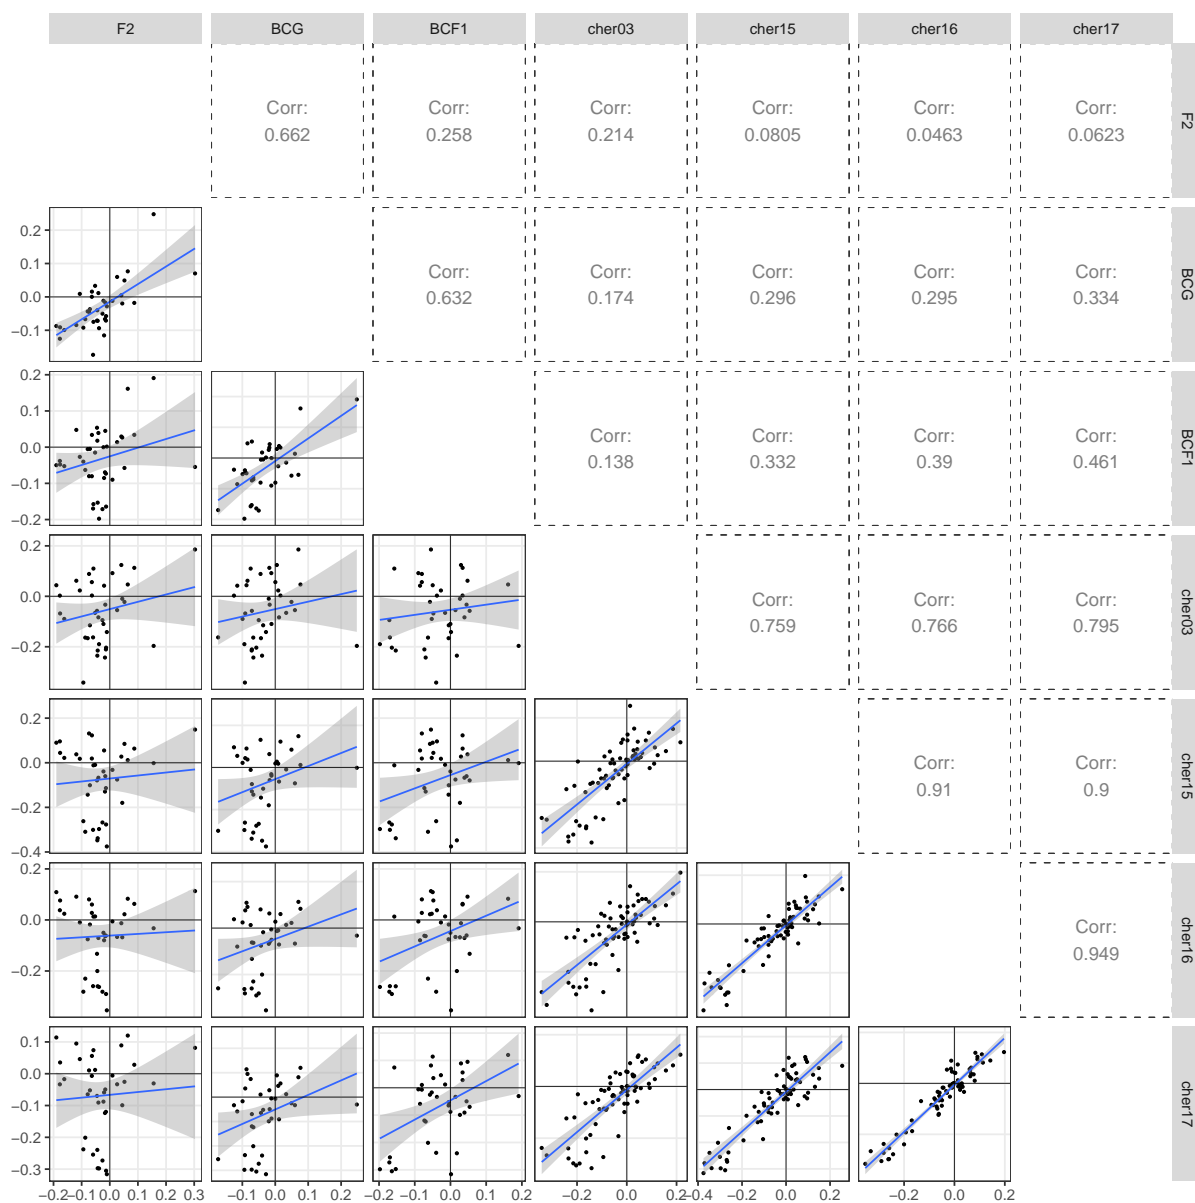

Figure S36: All correlations for Cherbourg HWE dataset



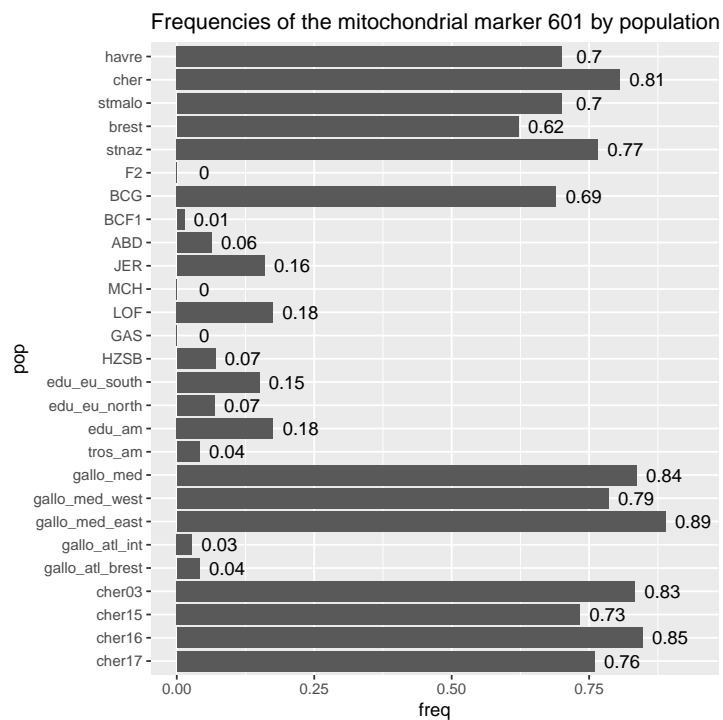

Figure S37: Population frequencies of the female mitochondrial marker 601.

## 2.8 Estimation of admixture time

Table S10: Estimation of the number of generations since admixture in ports.

| port   | average r | sd(r)   | generations |
|--------|-----------|---------|-------------|
| brest  | 0.05873   | 0.00007 | 5.87        |
| cher   | 0.07082   | 0.00006 | 7.08        |
| cher03 | 0.12713   | 0.00061 | 12.71       |
| cher15 | 0.07670   | 0.00031 | 7.67        |
| cher16 | 0.06290   | 0.00008 | 6.29        |
| cher17 | 0.06472   | 0.00013 | 6.47        |
| havre  | 0.13902   | 0.00018 | 13.90       |
| stmalo | 0.08277   | 0.00066 | 8.28        |
| stnaz  | 0.03472   | 0.00005 | 3.47        |

### 3 Additional information

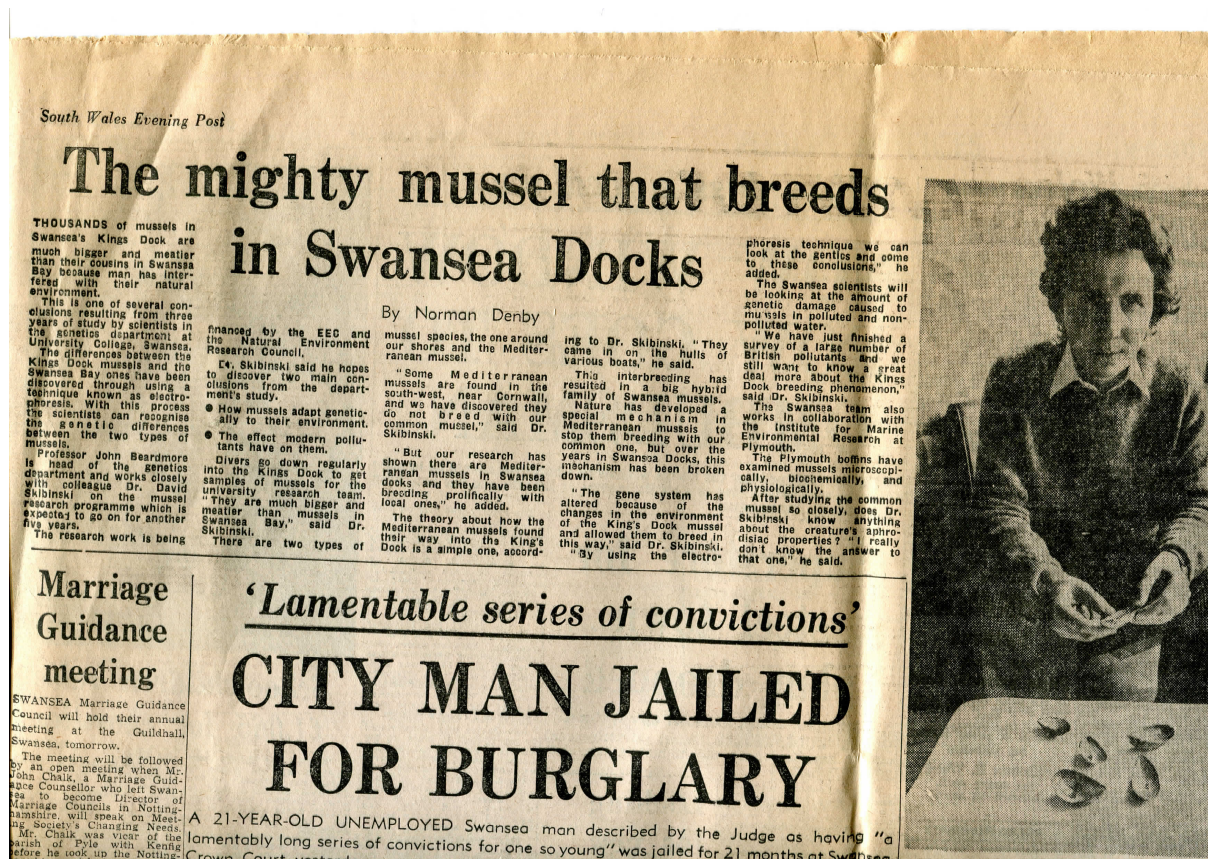

Figure S38: The mighty mussels: newspaper article about the Swansea King's dock mussels and the work of Prof. David Skibinski. South Wales Evening Post, 28th of June 1978.

## References

- Pritchard, J. K., Stephens, M., & Donnelly, P. (2000). Inference of population structure using multilocus genotype data. *Genetics*, *155*(2), 945–959. doi:10.1111/j.1471-8286.2007.01758.x
- Anderson, E. C., & Thompson, E. A. (2002). A Model-Based Method for Identifying Species Hybrids Using Multilocus Genetic Data. *Genetics*, *160*, 1217–1229.
- Broman, K. W., Wu, H., Sen, S., & Churchill, G. A. (2003). R/qtl: QTL mapping in experimental crosses. *Bioinformatics*, *19*, 889–890.
- Falush, D., Stephens, M., & Pritchard, J. K. (2003). Inference of Population Structure Using Multilocus Genotype Data: Linked Loci and Correlated Allele Frequencies. *Genetics*, *164*(4), 1567–1587.
- Shin, J.-H., Blay, S., McNeney, B., & Graham, J. (2006). LDheatmap: An R Function for Graphical Display of Pairwise Linkage Disequilibria Between Single Nucleotide Polymorphisms. *J Stat Soft*, *16*, Code Snippet 3.
- Wickham, H. (2007). Reshaping Data with the reshape Package. *Journal of Statistical Software*, *21*(12), 1–20.
- Jombart, T. (2008). Adegenet: A R package for the multivariate analysis of genetic markers. *Bioinformatics*, *24*, 1403–1405. doi:10.1093/bioinformatics/btn129
- Gompert, Z., & Buerkle, C. A. (2010). Introgress: A software package for mapping components of isolation in hybrids. *Molecular Ecology Resources*, *10*(2), 378–384. doi:10.1111/j.1755-0998.2009.02733.x
- Paradis, E. (2010). Pegas: An R package for population genetics with an integrated–modular approach. *Bioinformatics*, *26*, 419–420.
- Alexander, D. H., & Lange, K. (2011). Enhancements to the ADMIXTURE algorithm for individual ancestry estimation. *BMC Bioinformatics*, *12*(1), 246. doi:10.1186/1471-2105-12-246
- Jombart, T., & Ahmed, I. (2011). Adegenet 1.3-1: New tools for the analysis of genome-wide SNP data. *Bioinformatics*, *27*(21), 3070–3071. doi:10.1093/bioinformatics/btr521
- Warnes, G., Gorjanc, w. c. f. G., Leisch, F., & Man, M. (2013). Genetics: Population Genetics (Version R package version 1.3.8.1).
- Goudet, J., & Jombart, T. (2015). Hierfstat: Estimation and Tests of Hierarchical F-Statistics.
- Kopelman, N. M., Mayzel, J., Jakobsson, M., Rosenberg, N. A., & Mayrose, I. (2015). Clumpak: A program for identifying clustering modes and packaging population structure inferences across K. *Molecular Ecology Resources*, *15*(5), 1179–1191. doi:10.1111/1755-0998.12387
- Poole, W., Gibbs, D. L., Shmulevich, I., Bernard, B., & Knijnenburg, T. A. (2016). Combining dependent *P*- values with an empirical adaptation of Brown’s method. *Bioinformatics*, *32*(17), i430–i436. doi:10.1093/bioinformatics/btw438
- Analytics, R., & Weston, S. (2017). doMC: Foreach Parallel Adaptor for 'parallel' (Version R package version 1.3.5).
- Coolen, J. W. P. (2017). *North Sea reefs : Benthic biodiversity of artificial and rocky reefs in the southern North Sea* (PhD thesis, Wageningen University, Wageningen). Includes bibliographical references.-With summaries in Dutch and English.
- Microsoft, & Weston, S. (2017). Foreach: Provides Foreach Looping Construct for R (Version R package version 1.4.4).
- Wickham, H. (2017). Tidyverse: Easily Install and Load the 'Tidyverse' (Version R package version 1.2.1).

- Kassambara, A. (2018). Ggpubr: 'ggplot2' Based Publication Ready Plots (Version R package version 0.2).
- R Core Team. (2018). *R: A Language and Environment for Statistical Computing*. Vienna, Austria: R Foundation for Statistical Computing.
- Revelle, W. (2018). Psych: Procedures for Psychological, Psychometric, and Personality Research (Version R package version 1.8.12). Evanston, Illinois.
- Patil, I. (2019). Ggstatsplot: 'ggplot2' Based Plots with Statistical Details (Version R package version 0.0.8).
